# Supplementary material
Source: MDPI journal article supplement (https://www.mdpi.com/2073-4395/11/11/2366)
Supplement: s1 [file s1]

## Supplementary materials

### Contents

#### NMR parameters and spectra of the compound 1-9 identified from *P. clematidea* extract

**Table S1:** NMR data of compound **1**, apigenin

**Figure S1:** Full assignment  $^1\text{H}$  NMR spectrum of compound **1** recorded in  $\text{CD}_3\text{OD}$

**Figure S2:** Full assignment  $^{13}\text{C}$  NMR spectrum of compound **1** recorded in  $\text{CD}_3\text{OD}$

**Figure S3:**  $^1\text{H}$ - $^{13}\text{C}$  HMBC spectrum of compound **1** recorded in  $\text{CD}_3\text{OD}$

**Table S2:** NMR data of compound **2**, 4,4',4''-nitrotriphenol

**Figure S4:** Full assignment  $^1\text{H}$  NMR spectrum of compound **2** recorded in  $\text{CD}_3\text{OD}$

**Figure S5:**  $^1\text{H}$ - $^{13}\text{C}$  HMBC spectrum of compound **2** recorded in  $\text{CD}_3\text{OD}$

**Figure S6:**  $^1\text{H}$ - $^{15}\text{N}$  HMBC spectrum of compound **2** recorded in  $\text{CD}_3\text{OD}$

**Table S3:** NMR data of compound **3**, luteolin

**Figure S7:** Full assignment  $^1\text{H}$  NMR spectrum of compound **3** recorded in  $\text{CD}_3\text{OD}$

**Figure S8:**  $^{13}\text{C}$  NMR spectrum of compound **3** recorded in  $\text{CD}_3\text{OD}$

**Figure S9:**  $^1\text{H}$ - $^{13}\text{C}$  HMBC spectrum of compound **3** recorded in  $\text{CD}_3\text{OD}$

**Table S4:** NMR data of compound **4**, 3-*O*-methylquercetin

**Figure S10:** Full assignment  $^1\text{H}$  NMR spectrum of compound **4** recorded in  $\text{CD}_3\text{OD}$

**Figure S11:** NOESY spectrum of compound **4** recorded in  $\text{CD}_3\text{OD}$

**Figure S12:** Full assignment  $^{13}\text{C}$  NMR spectrum of compound **4** recorded in  $\text{CD}_3\text{OD}$

**Figure S13:**  $^1\text{H}$ - $^{13}\text{C}$  HMBC spectrum of compound **4** recorded in  $\text{CD}_3\text{OD}$

**Table S5:** NMR data of compound **5**, 4,4',4''-nitrotriphenyl  $\beta$ -D-glucopyranoside

**Figure S14:** Full assignment  $^1\text{H}$  NMR spectrum of compound **5** recorded in  $\text{CD}_3\text{OD}$

**Figure S15:** DQF-COSY spectrum of compound **5** recorded in  $\text{CD}_3\text{OD}$

**Figure S16:**  $^{13}\text{C}$  NMR spectrum of compound **5** recorded in  $\text{CD}_3\text{OD}$

**Figure S17:**  $^1\text{H}$ - $^{13}\text{C}$  HSQC spectrum of compound **5** recorded in  $\text{CD}_3\text{OD}$

**Figure S18:**  $^1\text{H}$ - $^{13}\text{C}$  HMBC spectrum of compound **5** recorded in  $\text{CD}_3\text{OD}$

**Figure S19:**  $^1\text{H}$ - $^{15}\text{N}$  HMBC spectrum of compound **5** recorded in  $\text{CD}_3\text{OD}$

**Table S6:** NMR data of compound **6**, scutellarein tetramethyl ether (4',5,6,7-Tetramethoxyflavone)

**Figure S20:** Full assignment  $^1\text{H}$  NMR spectrum of compound **6** recorded in  $\text{CD}_3\text{OD}$

**Figure S21:** NOESY spectrum of compound **6** recorded in  $\text{CD}_3\text{OD}$

**Figure S22:**  $^1\text{H}$ - $^{13}\text{C}$  HSQC spectrum of compound **6** recorded in  $\text{CD}_3\text{OD}$

**Figure S23:**  $^1\text{H}$ - $^{13}\text{C}$  HMBC spectrum of compound **6** recorded in  $\text{CD}_3\text{OD}$

**Table S7:** NMR data of compound **7**, apigenin trimethyl ether (4',5,7-Trimethoxyflavone)

**Figure S24:** Full assignment  $^1\text{H}$  NMR spectrum of compound **7** recorded in  $\text{CD}_3\text{OD}$

**Figure S25:** NOESY spectrum of compound **7** recorded in  $\text{CD}_3\text{OD}$

**Figure S26:**  $^{13}\text{C}$  NMR spectrum of compound **7** recorded in  $\text{CD}_3\text{OD}$

**Figure S27:**  $^1\text{H}$ - $^{13}\text{C}$  HSQC spectrum of compound **7** recorded in  $\text{CD}_3\text{OD}$

**Figure S28:**  $^1\text{H}$ - $^{13}\text{C}$  HMBC spectrum of compound **7** recorded in  $\text{CD}_3\text{OD}$

**Table S8:** NMR data of compound **8**, sinensetin (3',4',5,6,7-pentamethoxy flavone)

**Figure S29:** Full assignment  $^1\text{H}$  NMR spectrum of compound **8** recorded in  $\text{CD}_3\text{OD}$

**Figure S30:**  $^1\text{H}$ - $^{13}\text{C}$  HSQC spectrum of compound **8** recorded in  $\text{CD}_3\text{OD}$

**Figure S31:**  $^1\text{H}$ - $^{13}\text{C}$  HMBC spectrum of compound **8** recorded in  $\text{CD}_3\text{OD}$

**Table S9:** NMR data of compound **9**, luteolin tetramethyl ether (3',4',5,7-Tetramethoxyflavone)

**Figure S32:** Full assignment  $^1\text{H}$  NMR spectrum of compound **9** recorded in  $\text{CD}_3\text{OD}$

**Figure S33:** NOESY spectrum of compound **9** recorded in  $\text{CD}_3\text{OD}$

**Figure S34:**  $^1\text{H}$ - $^{13}\text{C}$  HSQC spectrum of compound **9** recorded in  $\text{CD}_3\text{OD}$

**Figure S35:**  $^1\text{H}$ - $^{13}\text{C}$  HMBC spectrum of compound **9** recorded in  $\text{CD}_3\text{OD}$

**Table S1:** NMR data of compound **1** identified from *P. clematidea* extract in CD<sub>3</sub>OD

| Position | <sup>13</sup> C-NMR<br>(150 MHz) | <sup>1</sup> H-NMR<br>(600 MHz) | HMBC<br>( <sup>1</sup> H → <sup>13</sup> C) |
|----------|----------------------------------|---------------------------------|---------------------------------------------|
| 2        | 166.3                            |                                 |                                             |
| 3        | 103.9                            | 6.59 (1H, s)                    | C-2,4,10,1'                                 |
| 4        | 184.0                            |                                 |                                             |
| 5        | 163.3                            |                                 |                                             |
| 6        | 100.2                            | 6.21 (1H, d, 2.1 Hz)            | C-5,7,8,10                                  |
| 7        | 166.2                            |                                 |                                             |
| 8        | 95.1                             | 6.45 (1H, d, 2.1 Hz)            | C-6,7, 9,10                                 |
| 9        | 159.5                            |                                 |                                             |
| 10       | 107.7                            |                                 |                                             |
| 1'       | 123.3                            |                                 |                                             |
| 2'       | 129.5                            | 7.85 (2H, d, 8.8 Hz)            | C-2,4',6'                                   |
| 3'       | 117.1                            | 6.93 (2H, d, 8.8 Hz)            | C-1',4',5'                                  |
| 4'       | 162.8                            |                                 |                                             |
| 5'       | 117.1                            | 6.93 (2H, d, 8.8 Hz)            | C-1',3',4'                                  |
| 6'       | 129.5                            | 7.85 (2H, d, 8.8 Hz)            | C-2,2',4'                                   |

Apigenin in MeOD-*d*<sub>4</sub>  
<sup>1</sup>H NMR at 298 K

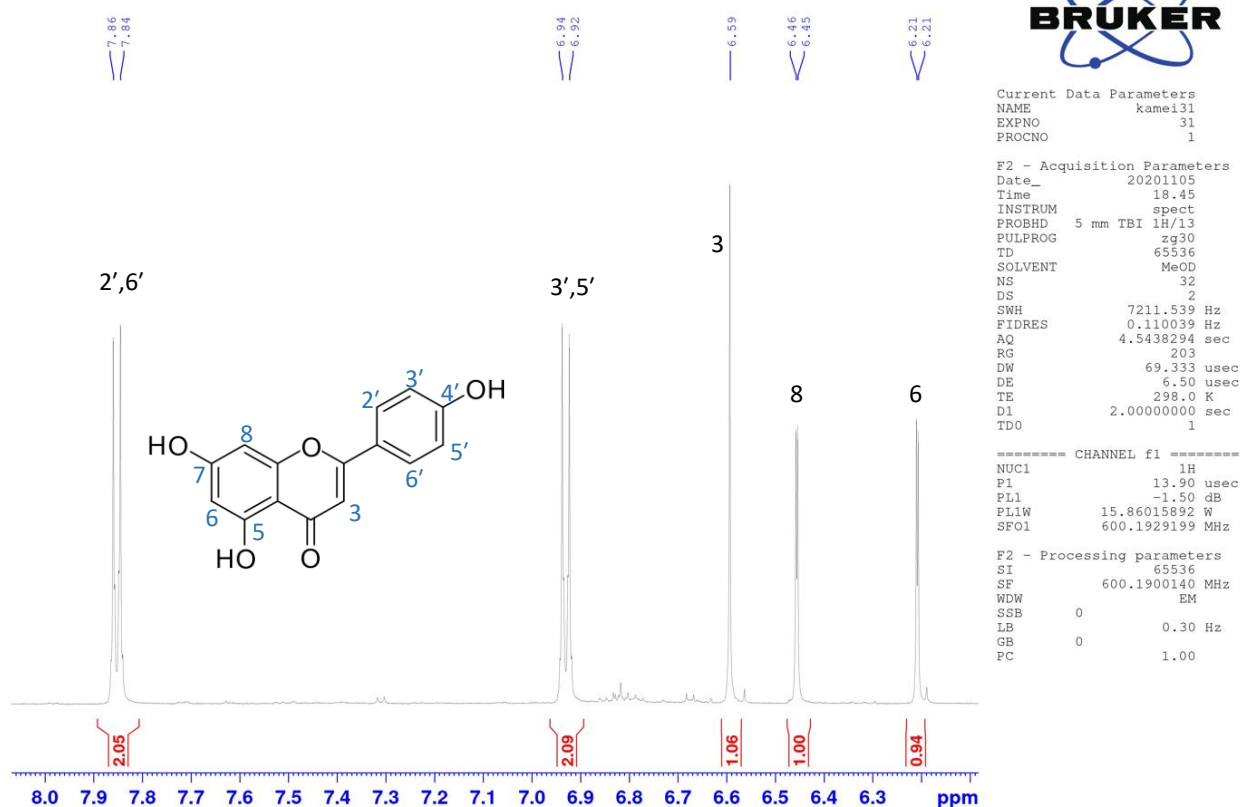**Figure S1:** Full assignment <sup>1</sup>H NMR spectrum of compound **1** recorded in CD<sub>3</sub>OD

Apigenin in MeOD-*d*<sub>4</sub>  
<sup>13</sup>C NMR at 298 K

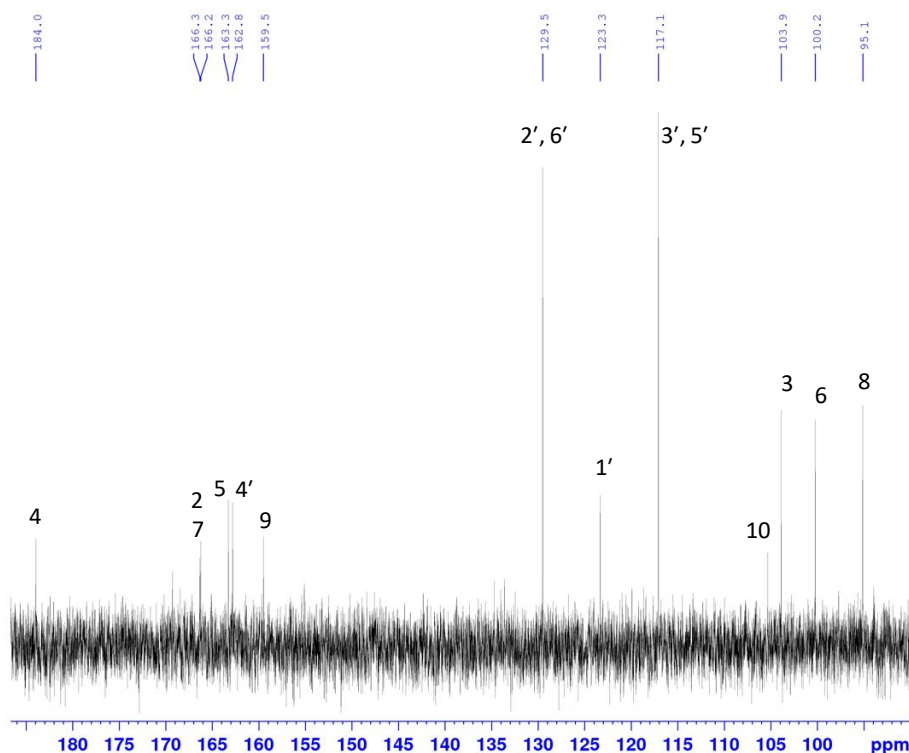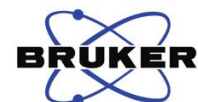

Current Data Parameters  
NAME kamei31  
EXPNO 49  
PROCNO 999

F2 - Acquisition Parameters  
Date\_ 20201113  
Time 16.19  
INSTRUM spect  
PROBHD 5 mm PABBO BB-  
PULPROG zgpg30  
TD 65536  
SOLVENT MeOD  
NS 2048  
DS 2  
SWH 36057.691 Hz  
FIDRES 0.550197 Hz  
AQ 0.9087659 sec  
RG 203  
DW 13.867 usec  
DE 30.00 usec  
TE 298.1 K  
D1 2.0000000 sec  
D11 0.0300000 sec  
TD0 1

===== CHANNEL f1 =====  
NUC1 13C  
P1 11.70 usec  
PL1 1.00 dB  
PL1W 85.59675598 W  
SFO1 150.9329873 MHz

===== CHANNEL f2 =====  
CPDPRG2 waltz16  
NUC2 1H  
PCPD2 70.00 usec  
PL2 -1.50 dB  
PL12 12.54 dB  
PL13 15.54 dB  
PL2W 15.86015892 W  
PL12W 0.62561554 W  
PL13W 0.31355053 W  
SFO2 600.1924008 MHz

F2 - Processing parameters  
SI 65536  
SF 150.9176760 MHz  
WDW EM  
SSB 0  
LB 1.00 Hz  
GB 0  
PC 1.40

**Figure S2:** Full assignment <sup>13</sup>C NMR spectrum of compound **1** recorded in CD<sub>3</sub>OD

Apigenin in MeOD-*d*<sub>4</sub>  
<sup>1</sup>H-<sup>13</sup>C HMBC at 298 K

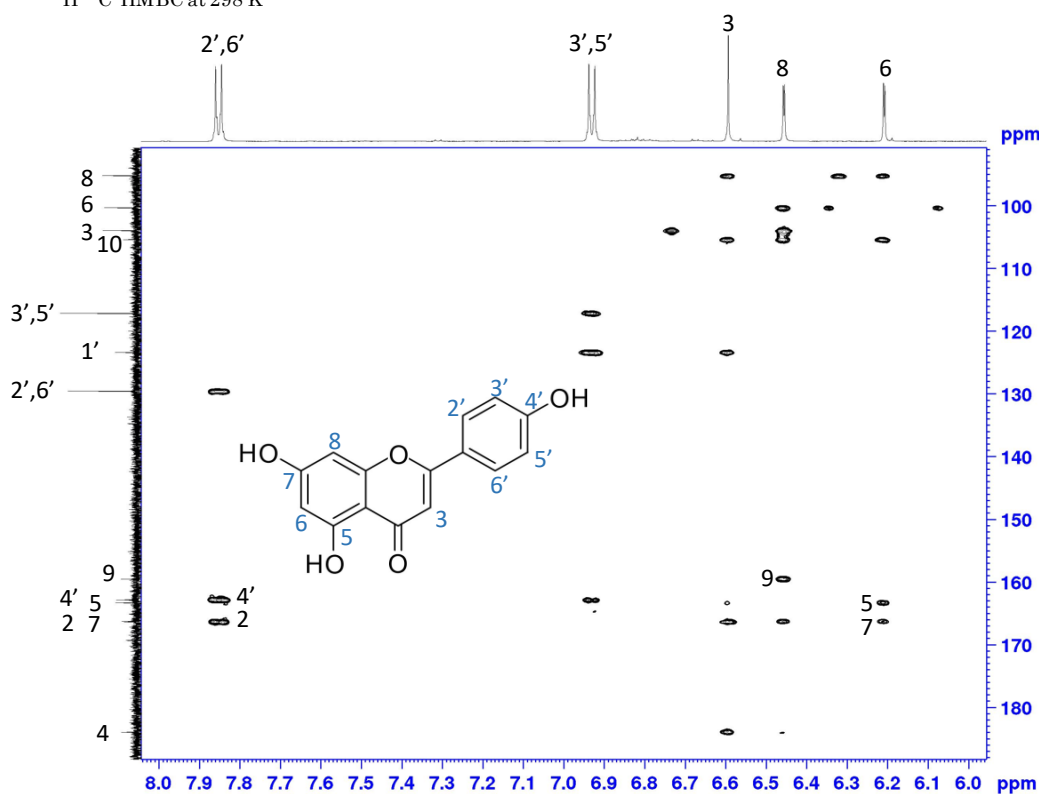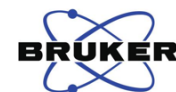

Current Data Parameters  
NAME kamei31  
EXPNO 1  
PROCNO 1

F2 - Acquisition Parameters  
Date\_ 20201105  
Time 21.20  
INSTRUM spect  
PROBHD 5 mm TBI 1H/13  
PULPROG hmcgprdt  
TD 4096  
SOLVENT MeOD  
NS 32  
DS 32  
SWH 5411.255 Hz  
FIDRES 1.321107 Hz  
AQ 0.3784704 sec  
RG 203  
DW 92.400 usec  
DE 30.00 usec  
TE 297.7 K  
D1 0.0000000 sec  
D11 2.0000000 sec  
D6 0.06250000 sec  
D16 0.00020000 sec  
INO 0.00001655 sec

===== CHANNEL f1 =====  
NUC1 1H  
P1 11.00 usec  
P2 22.00 usec  
PL1 -0.70 dB  
PL1W 13.19186502 W  
SFO1 600.1924128 MHz

===== CHANNEL f2 =====  
NUC2 13C  
P3 18.20 usec  
PL2 -3.50 dB  
PL2W 241.24443054 W  
SFO2 150.9322332 MHz

===== GRADIENT CHANNEL =====  
GPHAM[1] SINE.100  
GPHAM[2] SINE.100  
GPHAM[3] SINE.100  
GPE1 50.00 %  
GPE2 30.00 %  
GPE3 40.10 %  
P16 1800.00 usec

F1 - Acquisition parameters  
TD 512  
SFO1 150.9322 MHz  
FIDRES 117.91812 Hz  
SW 200.000 ppm  
F0MDOE QF

F2 - Processing parameters  
SI 1024  
SF 600.1900136 MHz  
WDW SINE  
SSB 0  
LB 0 Hz  
GB 0  
PC 1.40

F1 - Processing parameters  
SI 1024  
MC2 QF  
SF 150.9176614 MHz  
WDW SINE  
SSB 0  
LB 0 Hz  
GB 0

**Figure S3:** <sup>1</sup>H-<sup>13</sup>C HMBC spectrum of compound **1** recorded in CD<sub>3</sub>OD

**Table S2:** NMR data of compound **2** identified from *P. clematidea* extract in CD<sub>3</sub>OD

| Position    | <sup>13</sup> C-NMR<br>(150 MHz) | <sup>1</sup> H-NMR<br>(600 MHz) | HMBC<br>( <sup>1</sup> H → <sup>13</sup> C) |
|-------------|----------------------------------|---------------------------------|---------------------------------------------|
| 1 (1', 1'') | 153.5                            |                                 |                                             |
| 2 (2', 2'') | 116.8                            | 6.65 (6H, d, 8.7 Hz)            | C-1,3,4,6                                   |
| 3 (3', 3'') | 126.0                            | 6.79 (6H, d, 8.7 Hz)            | C-1,2,4,5                                   |
| 4 (4', 4'') | 142.9                            |                                 |                                             |
| 5 (5', 5'') | 126.0                            | 6.79 (6H, d, 8.7 Hz)            | C-1,3,4,6                                   |
| 6 (6', 6'') | 116.8                            | 6.65 (6H, d, 8.7 Hz)            | C-1,2,4,5                                   |

4,4',4''-Nitritotriphenol in MeOD-*d*<sub>4</sub>  
<sup>1</sup>H NMR at 298 K

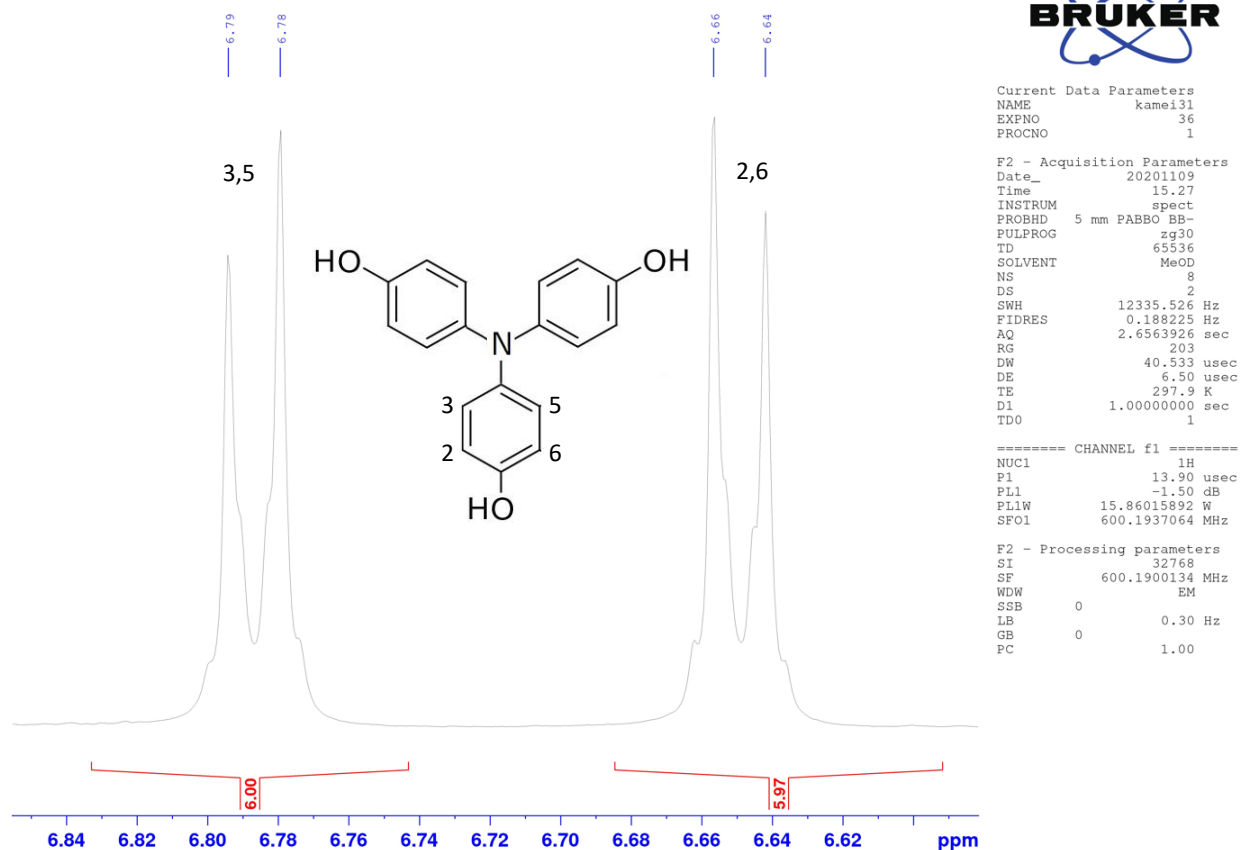

**Figure S4:** Full assignment <sup>1</sup>H NMR spectrum of compound **2** recorded in CD<sub>3</sub>OD

4,4',4''-Nitrilotriphenol in MeOD-*d*<sub>4</sub>  
<sup>1</sup>H-<sup>13</sup>C-HMBC at 298 K

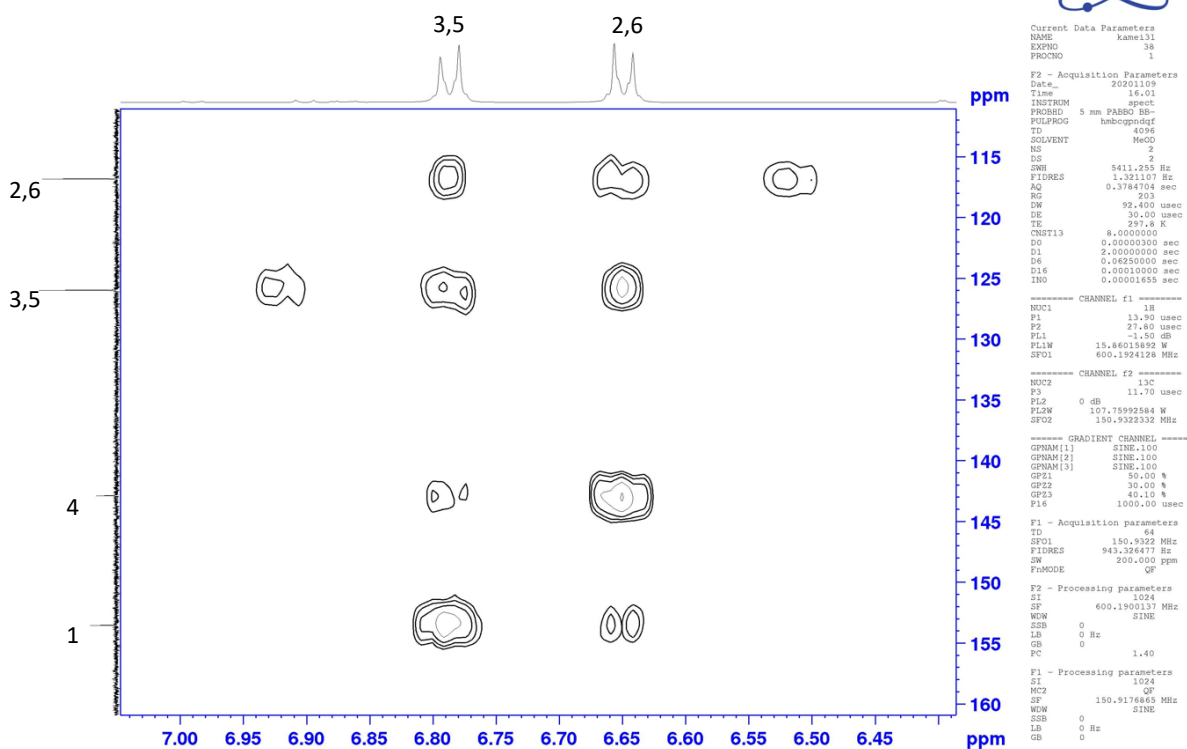

4,4',4''-Nitrilotriphenol in MeOD-*d*<sub>4</sub>  
<sup>1</sup>H-<sup>15</sup>N-HMBC at 298 K

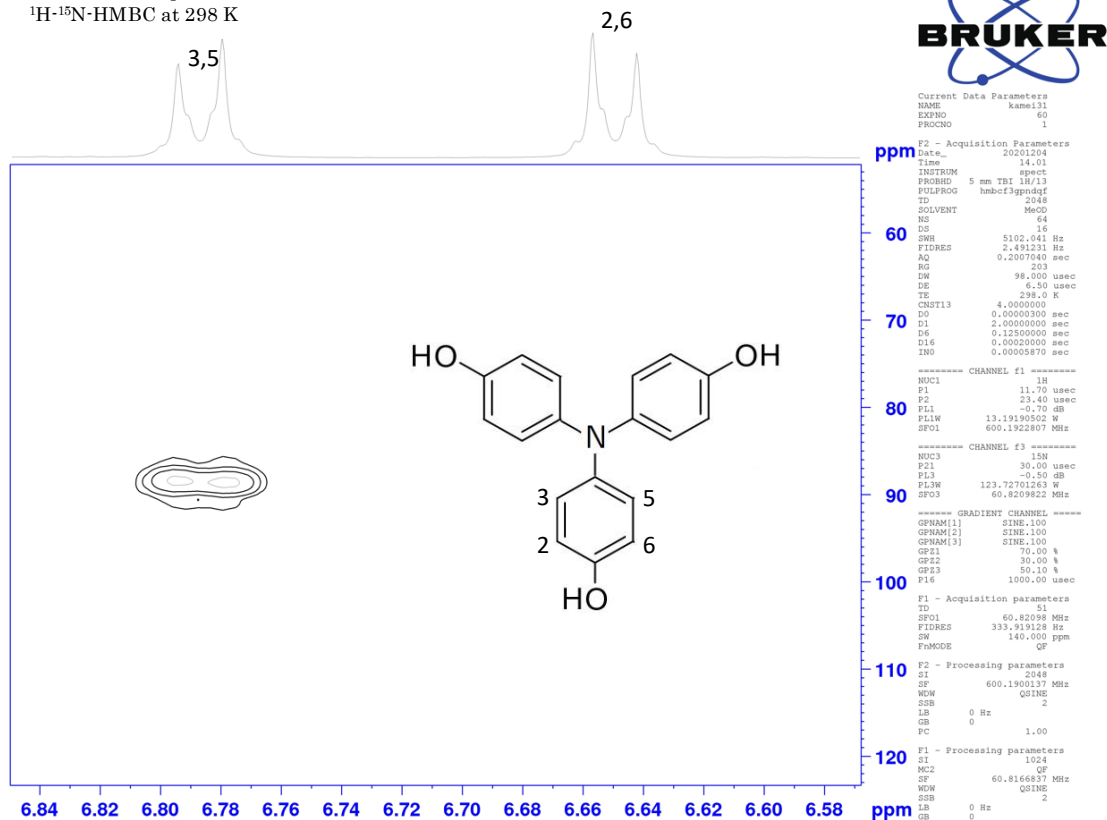

**Table S3:** NMR data of compound **3** identified from *P. clematidea* extract in CD<sub>3</sub>OD

| Position | <sup>13</sup> C-NMR<br>(150 MHz) | <sup>1</sup> H-NMR<br>(600 MHz) | HMBC<br>( <sup>1</sup> H → <sup>13</sup> C) |
|----------|----------------------------------|---------------------------------|---------------------------------------------|
| 2        | 166.4                            |                                 |                                             |
| 3        | 103.9                            | 6.53 (1H, s)                    | C-2,4,10,1'                                 |
| 4        | 183.9                            |                                 |                                             |
| 5        | 163.3                            |                                 |                                             |
| 6        | 100.2                            | 6.20 (1H, d, 1.5 Hz)            | C-5,7,8,10                                  |
| 7        | 166.1                            |                                 |                                             |
| 8        | 95.0                             | 6.43 (1H, d, 1.5 Hz)            | C-2,3,6,9,10                                |
| 9        | 159.5                            |                                 |                                             |
| 10       | 105.3                            |                                 |                                             |
| 1'       | 123.7                            |                                 |                                             |
| 2'       | 114.2                            | 7.37 (1H, s)                    | C-2, 3',4',6'                               |
| 3'       | 147.1                            |                                 |                                             |
| 4'       | 151.0                            |                                 |                                             |
| 5'       | 116.8                            | 6.90 (1H, d, 8.6 Hz)            | C-1',3',4'                                  |
| 6'       | 120.3                            | 7.38 (1H, dd, 8.6, 1.5 Hz)      | C-2,2',4'                                   |

Luteolin in MeOD-*d*<sub>4</sub>  
<sup>1</sup>H NMR at 298 K

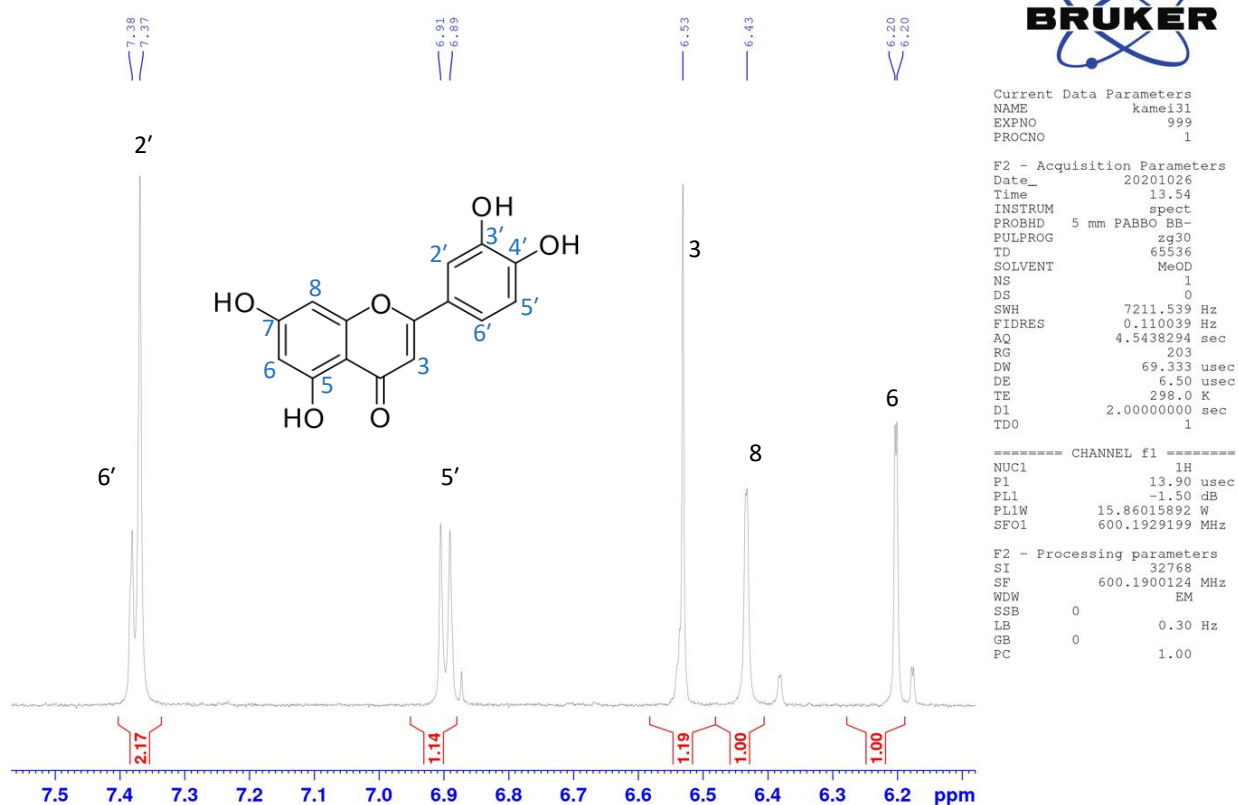**Figure S7:** Full assignment <sup>1</sup>H NMR spectrum of compound **3** recorded in CD<sub>3</sub>OD

Luteolin in MeOD-*d*<sub>4</sub>  
<sup>13</sup>C NMR at 298 K

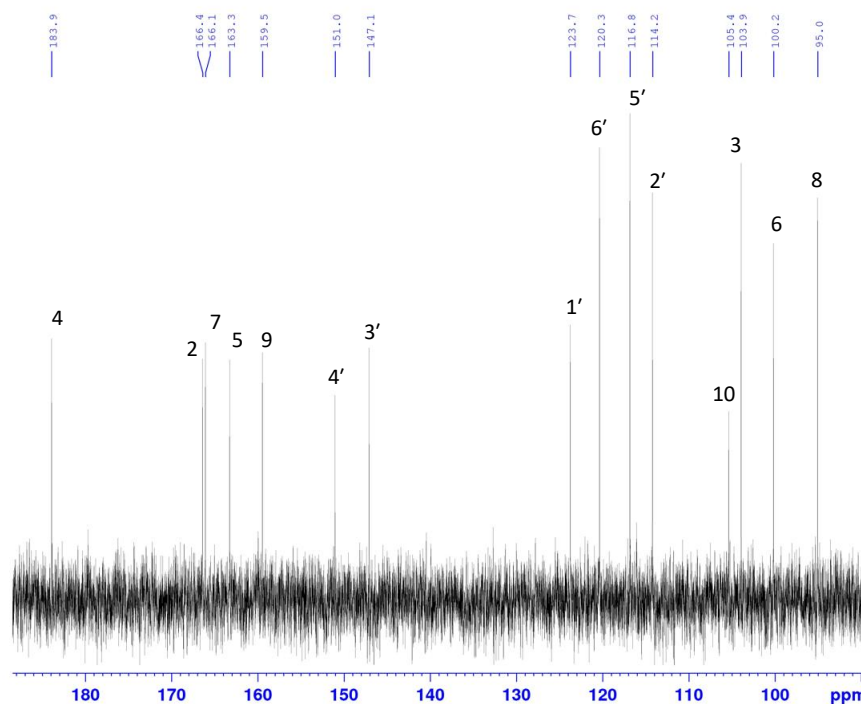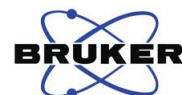

Current Data Parameters  
NAME kamei31  
EXPNO 46  
PROCNO 1

F2 - Acquisition Parameters  
Date\_ 20201113  
Time 14.28  
INSTRUM spect  
PROBHD 5 mm PABBO BB-  
PULPROG zgpg30  
TD 65536  
SOLVENT MeOD  
NS 552  
DS 2  
SWH 36057.691 Hz  
FIDRES 0.550197 Hz  
AQ 0.9087659 sec  
RG 203  
DW 13.867 usec  
DE 30.00 usec  
TE 298.3 K  
D1 2.0000000 sec  
D11 0.0300000 sec  
TD0 1

===== CHANNEL f1 =====  
NUC1 13C  
P1 11.70 usec  
PL1 1.00 dB  
PL1W 85.59675598 W  
SF01 150.9329873 MHz

===== CHANNEL f2 =====  
CPDPRG[2] waltz16  
NUC2 1H  
PCPD2 70.00 usec  
PL2 -1.50 dB  
PL12 12.54 dB  
PL13 15.54 dB  
PL2W 15.86015892 W  
PL12W 0.62561554 W  
PL13W 0.31355053 W  
SF02 600.1924008 MHz

F2 - Processing parameters  
SI 65536  
SF 150.9176767 MHz  
WDW EM  
SSB 0  
LB 1.00 Hz  
GB 0  
PC 1.40

**Figure S8:** <sup>13</sup>C NMR spectrum of compound **3** recorded in CD<sub>3</sub>OD

Luteolin in MeOD-*d*<sub>4</sub>  
<sup>1</sup>H-<sup>13</sup>C-HMBC at 298 K

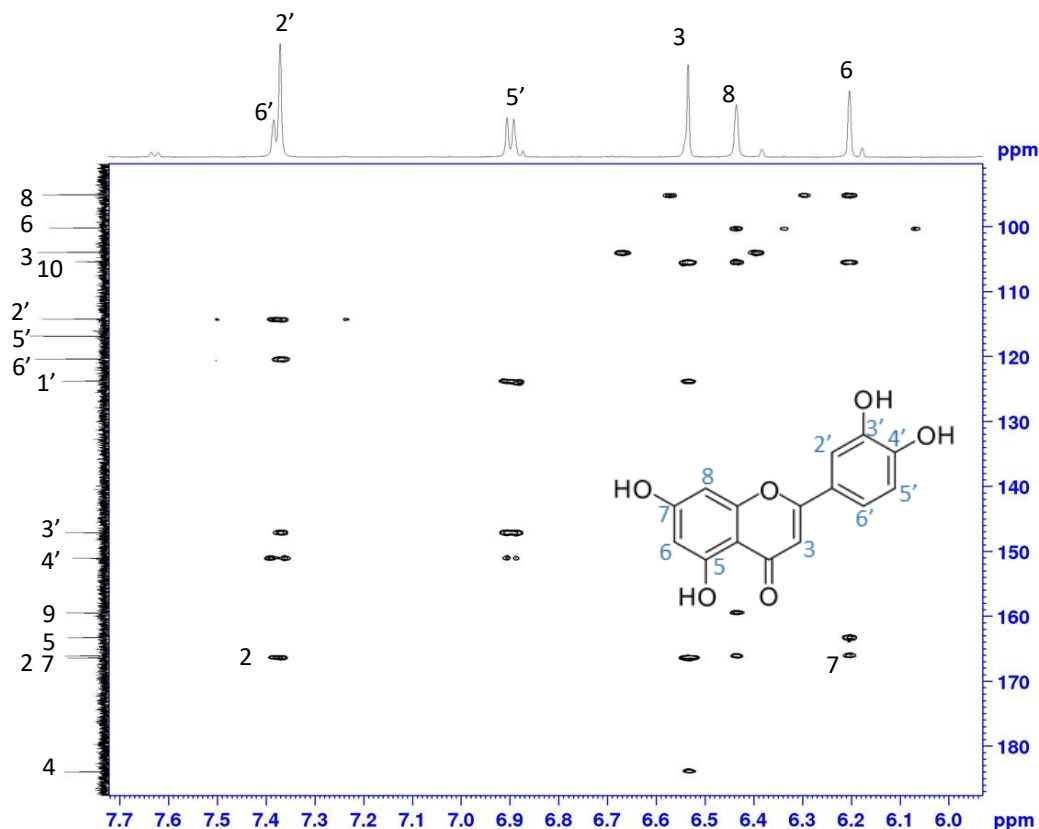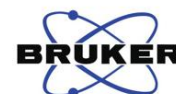

Current Data Parameters  
NAME kamei31  
EXPNO 67  
PROCNO 1

F2 - Acquisition Parameters  
Date\_ 20201210  
Time 10.31  
INSTRUM spect  
PROBHD 5 mm PABBO BB-  
PULPROG hmcpgpddg  
TD 4096  
SOLVENT MeOD  
NS 2  
DS 2  
SWH 5411.255 Hz  
FIDRES 1.321107 Hz  
AQ 0.3784704 sec  
RG 203  
DW 92.400 usec  
DE 30.00 usec  
TE 297.8 K  
D1 8.0000000 sec  
D11 0.0000000 sec  
D16 0.0025000 sec  
D16 0.0001000 sec  
INO 0.0001655 sec

===== CHANNEL f1 =====  
NUC1 1H  
P1 13.90 usec  
P2 27.80 usec  
PL1 -1.50 dB  
PL1W 15.86015892 W  
SF01 600.1924128 MHz

===== CHANNEL f2 =====  
NUC2 13C  
P3 11.70 usec  
PL2 0 dB  
PL2W 107.75992584 W  
SF02 150.9322332 MHz

===== GRADIENT CHANNEL =====  
GPMAM[1] SINE.100  
GPMAM[2] SINE.100  
GPMAM[3] SINE.100  
GPE1 50.00 %  
GPE2 30.00 %  
GPE3 40.10 %  
P16 1000.00 usec

F1 - Acquisition parameters  
TD 512  
SF01 150.9322 MHz  
FIDRES 117.915810 Hz  
SW 200.000 ppm  
FhMODE QF

F2 - Processing parameters  
SI 1024  
SF 600.1907109 MHz  
WDW SINE  
SSB 0  
LB 0 Hz  
GB 0  
PC 1.40

F1 - Processing parameters  
SI 1024  
MC2 QF  
SF 150.9176737 MHz  
WDW SINE  
SSB 0  
LB 0 Hz  
GB 0

**Figure S9:** <sup>1</sup>H-<sup>13</sup>C HMBC spectrum of compound **3** recorded in CD<sub>3</sub>OD



**Table S4:** NMR data of compound **4** identified from *P. clematidea* extract in CD<sub>3</sub>OD

| Position | <sup>13</sup> C-NMR<br>(150 MHz) | <sup>1</sup> H-NMR<br>(600 MHz) | HMBC<br>( <sup>1</sup> H → <sup>13</sup> C) |
|----------|----------------------------------|---------------------------------|---------------------------------------------|
| 2        | 158.1                            |                                 |                                             |
| 3        | 139.6                            |                                 |                                             |
| 4        | 180.1                            |                                 |                                             |
| 5        | 163.2                            |                                 |                                             |
| 6        | 99.8                             | 6.20 (1H, d, 2.0 Hz)            | C-5,7,8,10                                  |
| 7        | 166.1                            |                                 |                                             |
| 8        | 94.8                             | 6.40 (1H, d, 2.2 Hz)            | C-6,7,9,10                                  |
| 9        | 158.5                            |                                 |                                             |
| 10       | 105.9                            |                                 |                                             |
| 1'       | 123.0                            |                                 |                                             |
| 2'       | 116.5                            | 7.62 (1H, d, 2.2 Hz)            | C-2, 3',4',6'                               |
| 3'       | 146.5                            |                                 |                                             |
| 4'       | 150.0                            |                                 |                                             |
| 5'       | 116.5                            | 6.90 (1H, d, 8.5 Hz)            | C-1',3',4'                                  |
| 6'       | 122.4                            | 7.53 (1H, dd 8.5, 2.2 Hz)       | C-2,2',4'                                   |
| 3-O-Me   | 60.6                             | 3.78                            | C-3                                         |

Quercetin-3-*O*-Me in MeOD-*d*<sub>4</sub>  
<sup>1</sup>H NMR at 298 K

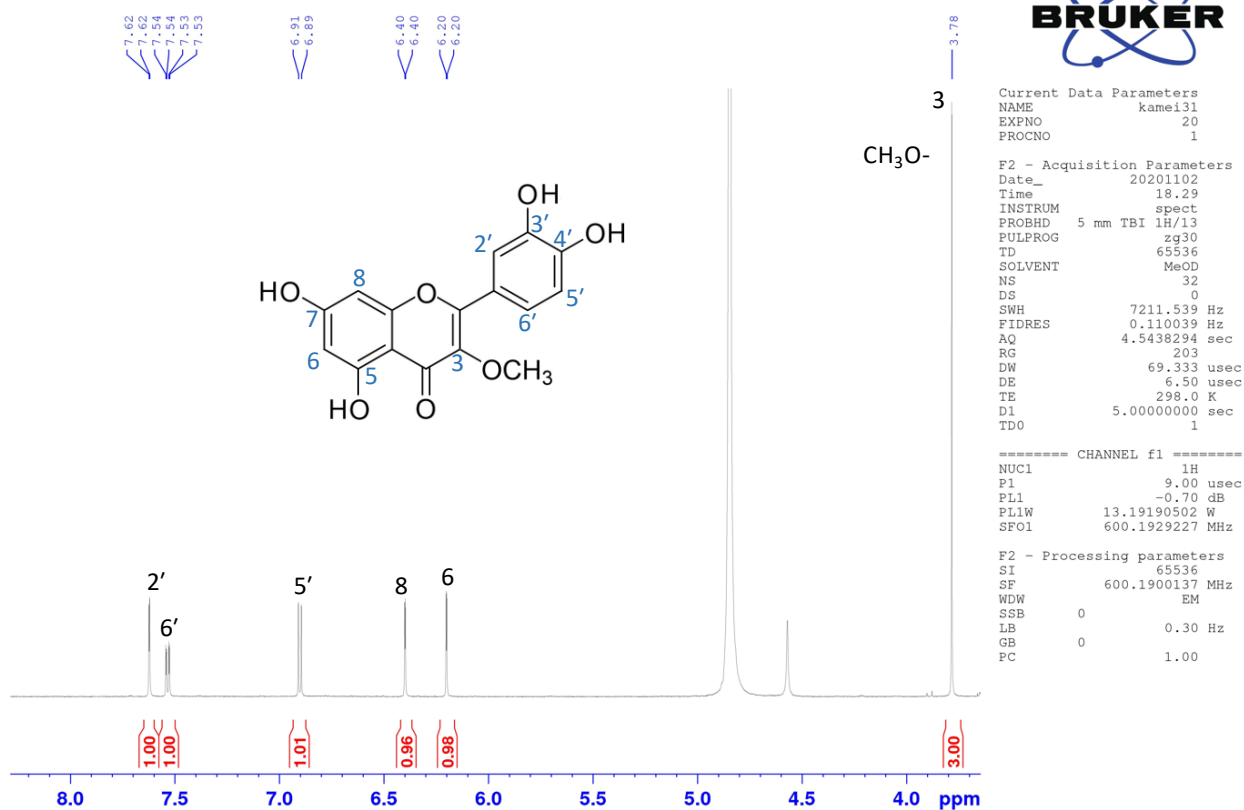**Figure S10:** Full assignment <sup>1</sup>H NMR spectrum of compound **4** recorded in CD<sub>3</sub>OD

Quercetin-3-*O*-Me in MeOD-*d*<sub>4</sub>  
NOESY at 298 K

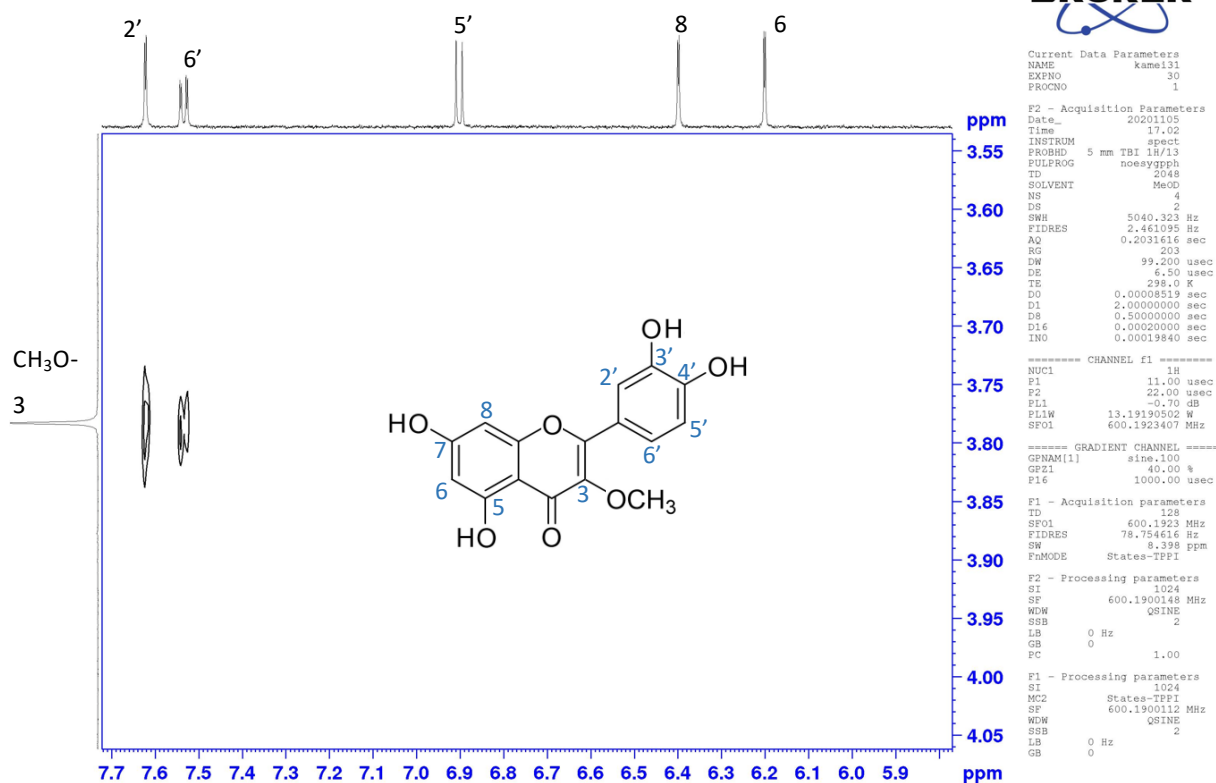

**Figure S11:** NOESY spectrum of compound **4** recorded in CD<sub>3</sub>OD

Quercetin-3-*O*-Me in MeOD-*d*<sub>4</sub>  
<sup>13</sup>C NMR at 298 K

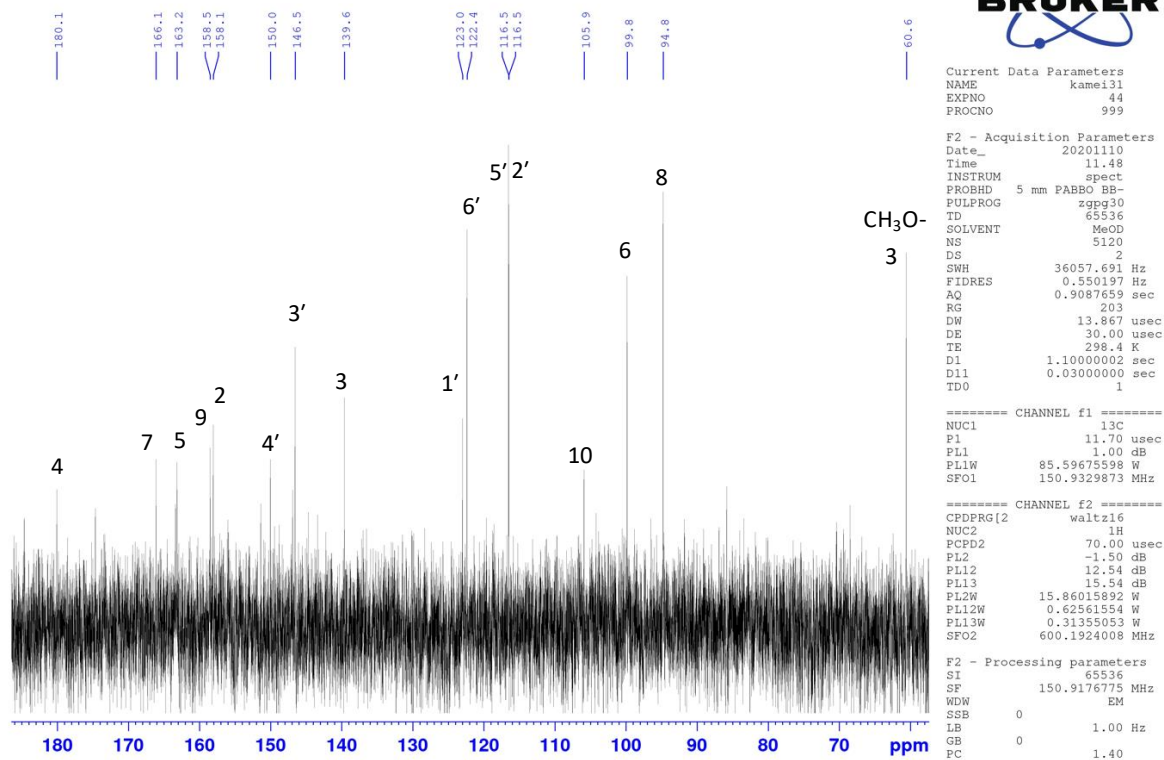

**Figure S12:** Full assignment <sup>13</sup>C NMR spectrum of compound **4** recorded in CD<sub>3</sub>OD

Quercetin-3-*O*-Me in MeOD-*d*<sub>4</sub>  
<sup>1</sup>H-<sup>13</sup>C-HMBC at 298 K

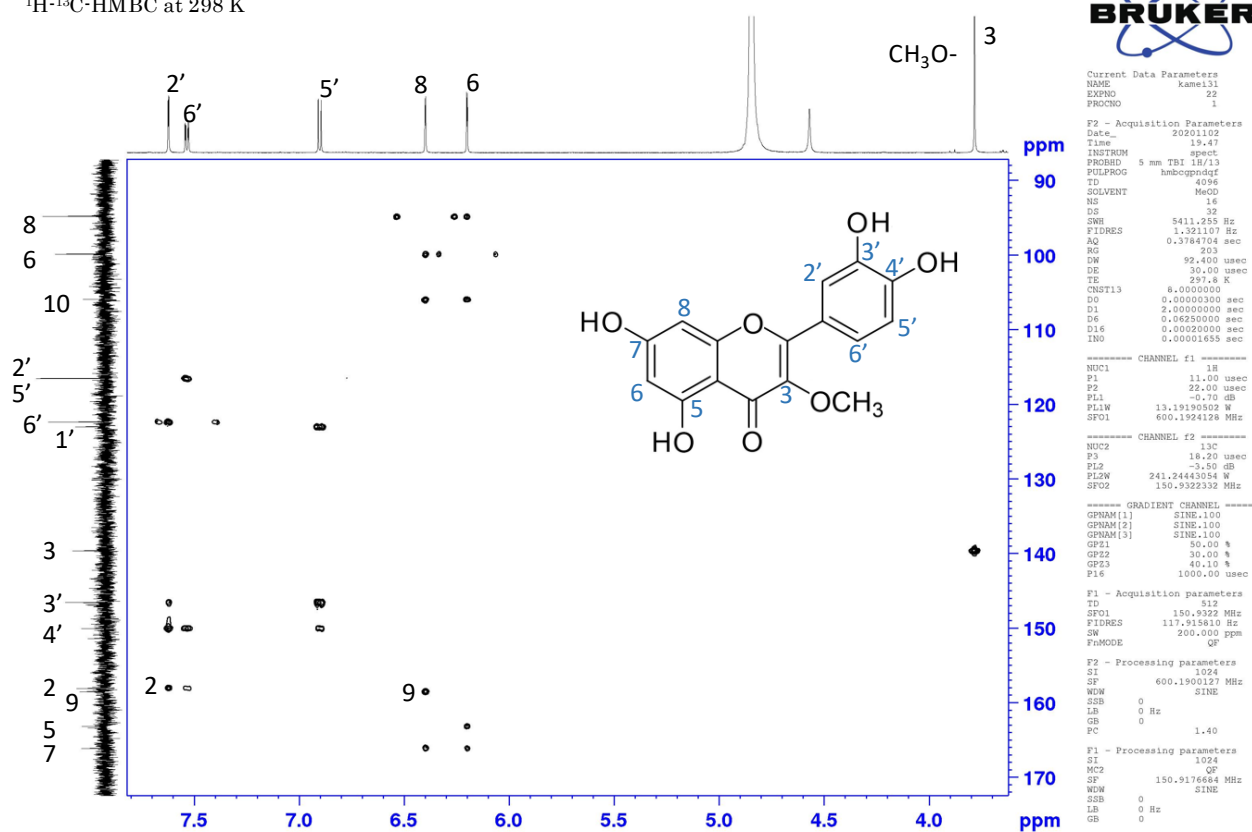

**Figure S13:** <sup>1</sup>H-<sup>13</sup>C HMBC spectrum of compound **4** recorded in CD<sub>3</sub>OD

**Table S5:** NMR data of compound **6** identified from *P. clematidea* extract in CD<sub>3</sub>OD

| Position | <sup>13</sup> C-NMR<br>(150 MHz) | <sup>1</sup> H-NMR<br>(600 MHz)                            | HMBC<br>( <sup>1</sup> H → <sup>13</sup> C) |
|----------|----------------------------------|------------------------------------------------------------|---------------------------------------------|
| 1        | 153.6                            |                                                            |                                             |
| 2        | 118.8                            | 6.95 (2H, d, 9.0 Hz)                                       | C-1,3,4,6                                   |
| 3        | 124.0                            | 6.82 (2H, d, 9.0 Hz)                                       | C-1,2,4,5                                   |
| 4        | 145.3                            |                                                            |                                             |
| 5        | 124.0                            | 6.82 (2H, d, 9.0 Hz)                                       | C-1,3,4,6                                   |
| 6        | 118.8                            | 6.95 (2H, d, 9.0 Hz)                                       | C-1,2,4,5                                   |
| 1',1''   | 154.2                            |                                                            |                                             |
| 2',2''   | 116.9                            | 6.68 (4H, d, 9.0 Hz)                                       | C-1',3',4',6' C-1'',3'',4'',6''             |
| 3',3''   | 126.8                            | 6.83 (4H, d, 9.0 Hz)                                       | C-1',2',4',5' C-1'',2'',4'',5''             |
| 4',4''   | 142.3                            |                                                            |                                             |
| 5',5''   | 126.8                            | 6.83 (4H, d, 9.0 Hz)                                       | C-1',3',4',6' C-1'',3'',4'',6''             |
| 6',6''   | 116.9                            | 6.68 (4H, d, 9.0 Hz)                                       | C-1',2',4',5' C-1'',2'',4'',5''             |
| glc 1    | 103.1                            | 4.80 (1H, d, 7.4 Hz)                                       | C-1, glc C-2                                |
| glc 2    | 75.0                             | 3.42 (1H, m)                                               | glc C-1, glc C-3                            |
| glc 3    | 78.1                             | 3.44 (1H, m)                                               | glc C-5                                     |
| glc 4    | 71.5                             | 3.38 (1H, m)                                               |                                             |
| glc 5    | 78.1                             | 3.38 (1H, m)                                               |                                             |
| glc 6    | 62.6                             | 3.69 (1H, dd, 11.9, 5.1 Hz)<br>3.88 (1H, dd, 11.9, 1.5 Hz) | glc C-5                                     |

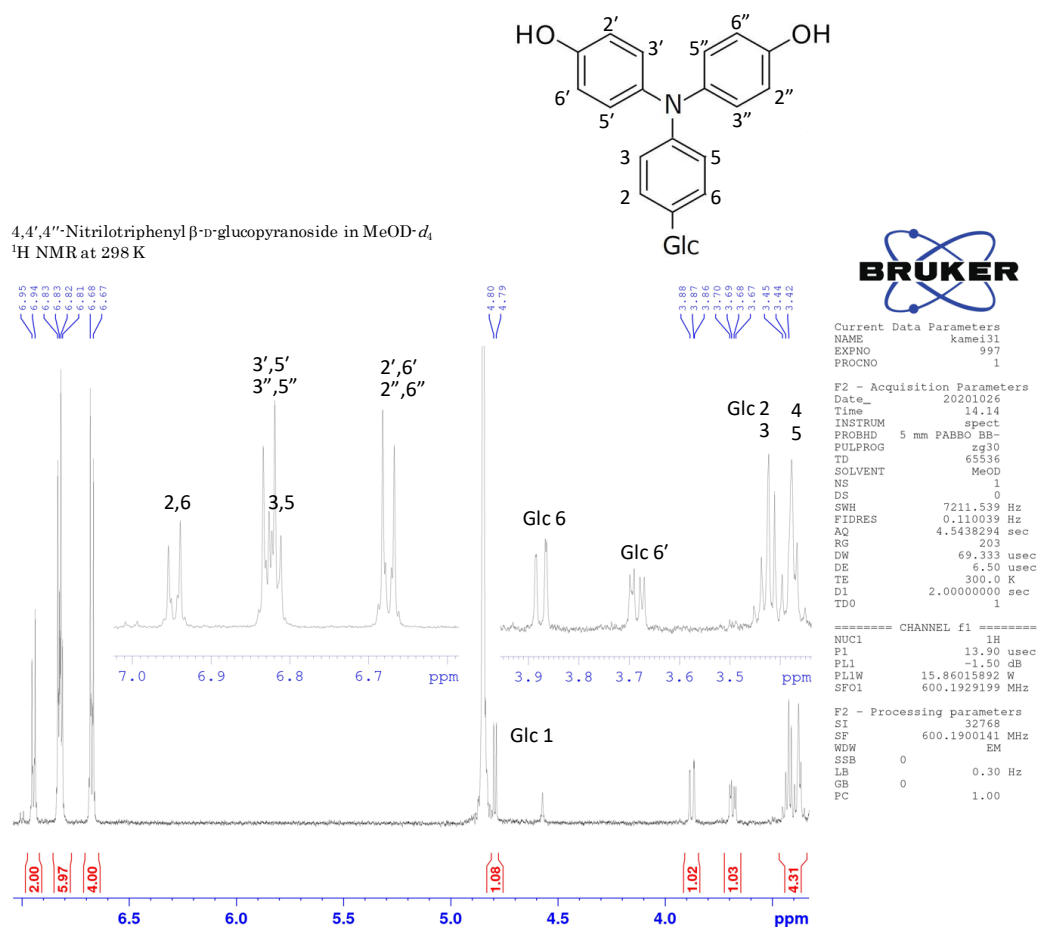**Figure S14:** Full assignment <sup>1</sup>H NMR spectrum of compound **5** recorded in CD<sub>3</sub>OD

4,4',4''-Nitrilotriphenyl  $\beta$ -D-glucopyranoside in MeOD- $d_4$   
DQF-COSY at 298 K

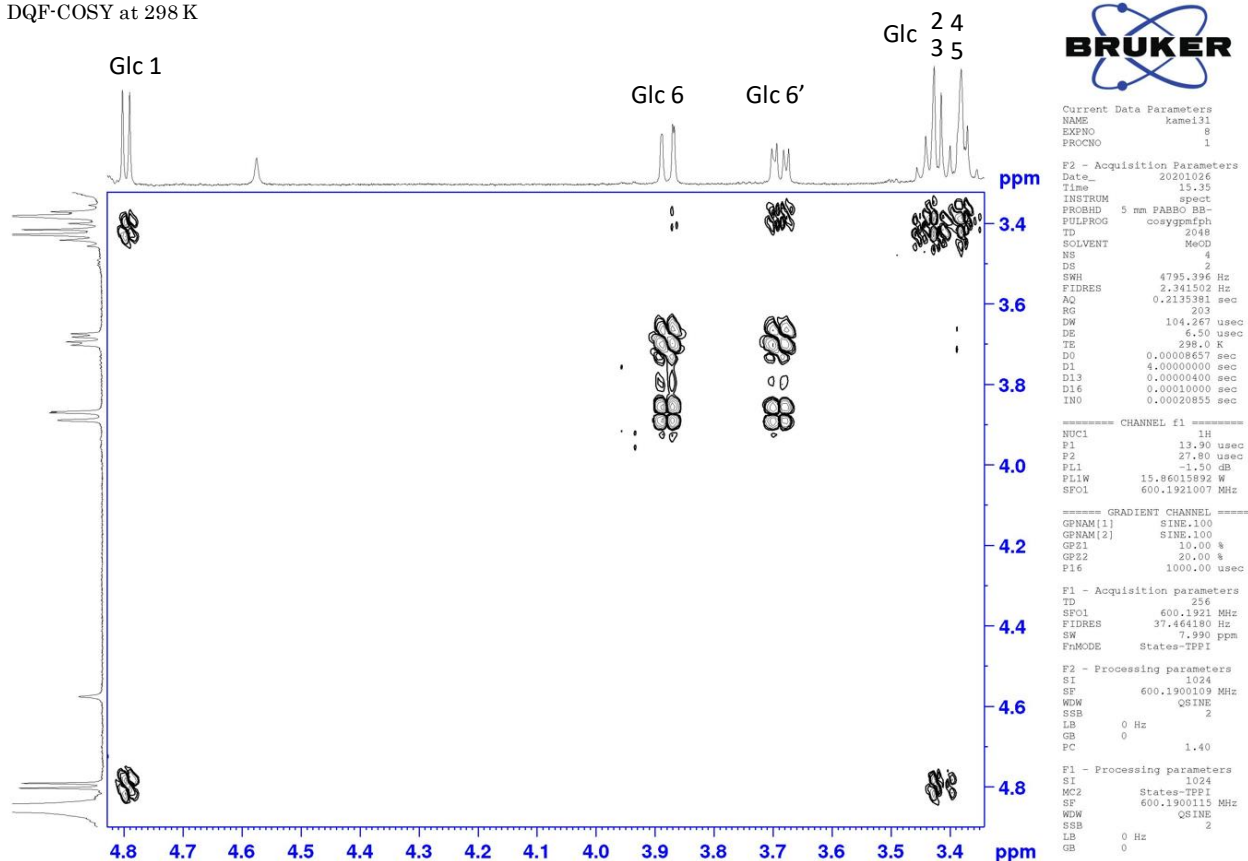

**Figure S15:** DQF-COSY spectrum of compound **5** recorded in CD<sub>3</sub>OD

4,4',4''-Nitrilotriphenyl  $\beta$ -D-glucopyranoside in MeOD- $d_4$   
<sup>13</sup>C NMR at 298 K

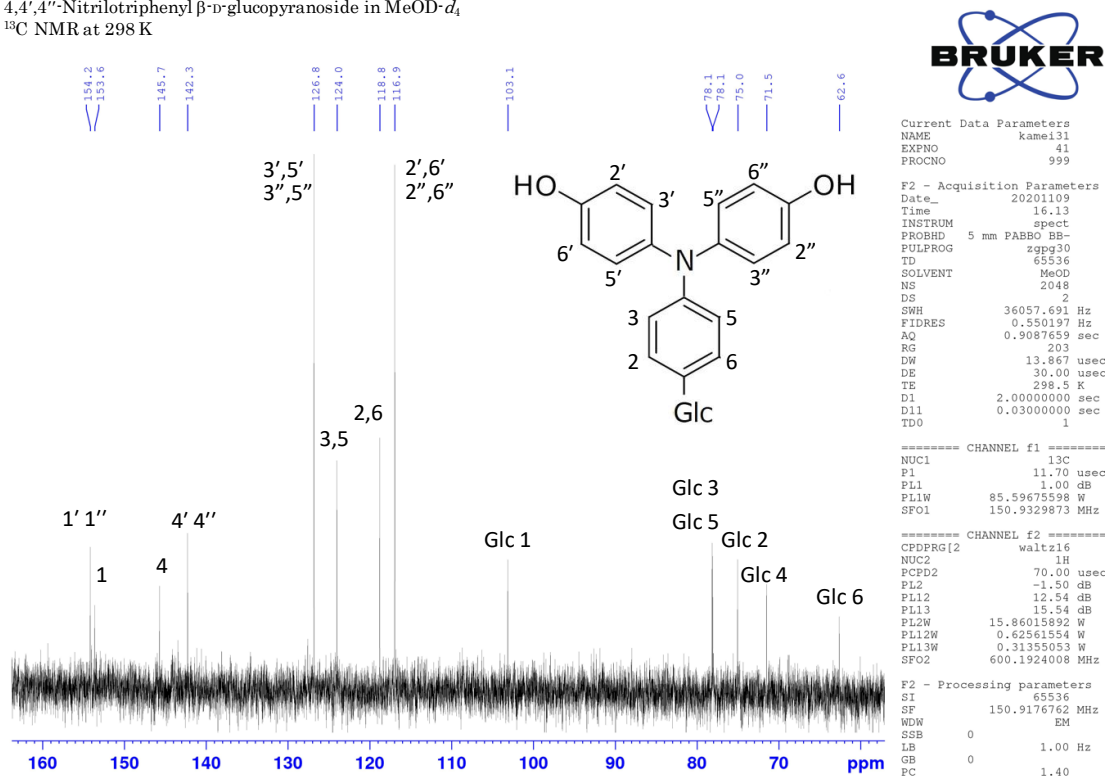

**Figure S16:** <sup>13</sup>C NMR spectrum of compound **5** recorded in CD<sub>3</sub>OD

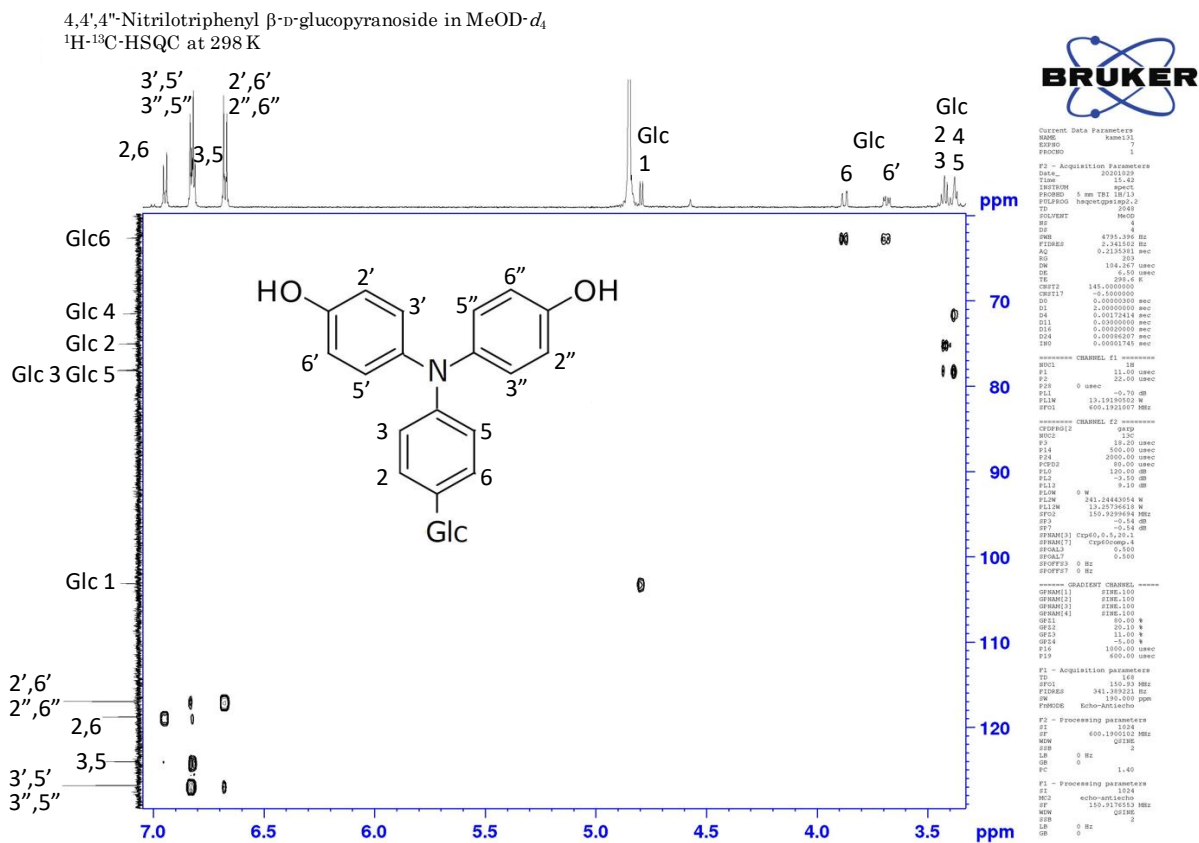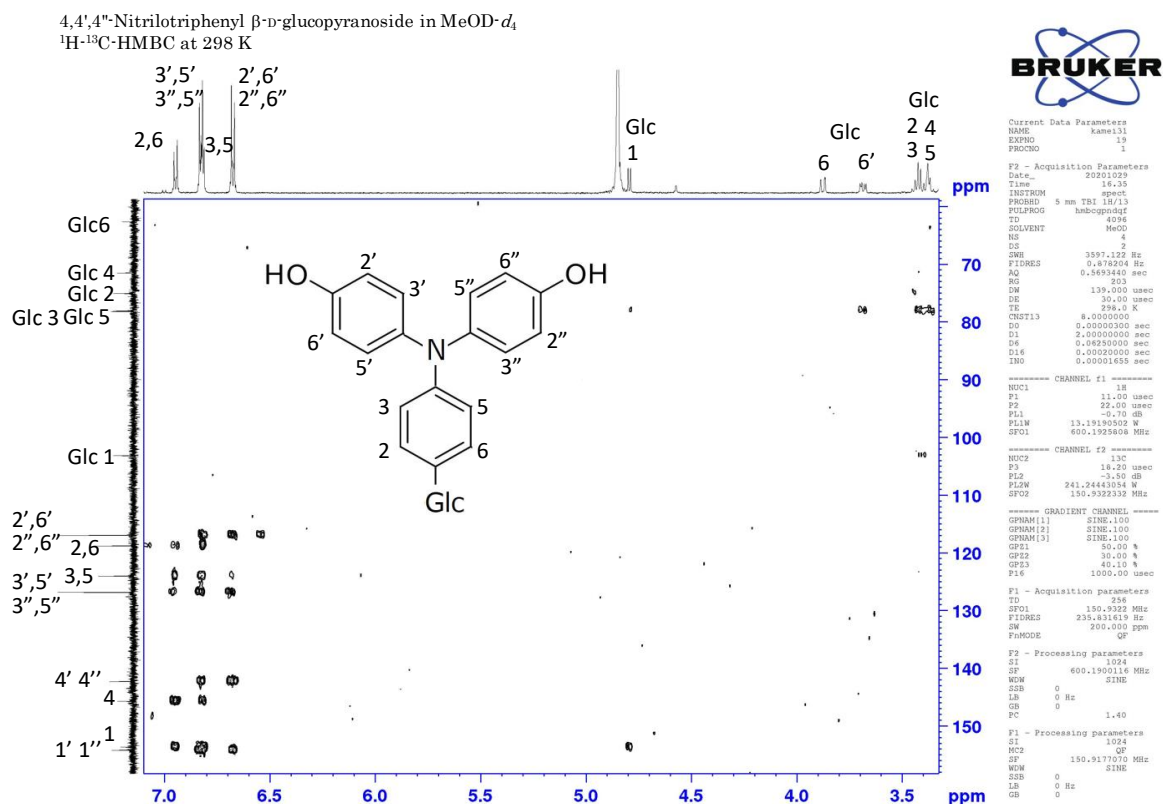

4,4',4''-Nitrilotriphenyl  $\beta$ -D-glucopyranoside in MeOD- $d_4$   
 $^1\text{H}$ - $^{15}\text{N}$ -HMBC at 298 K

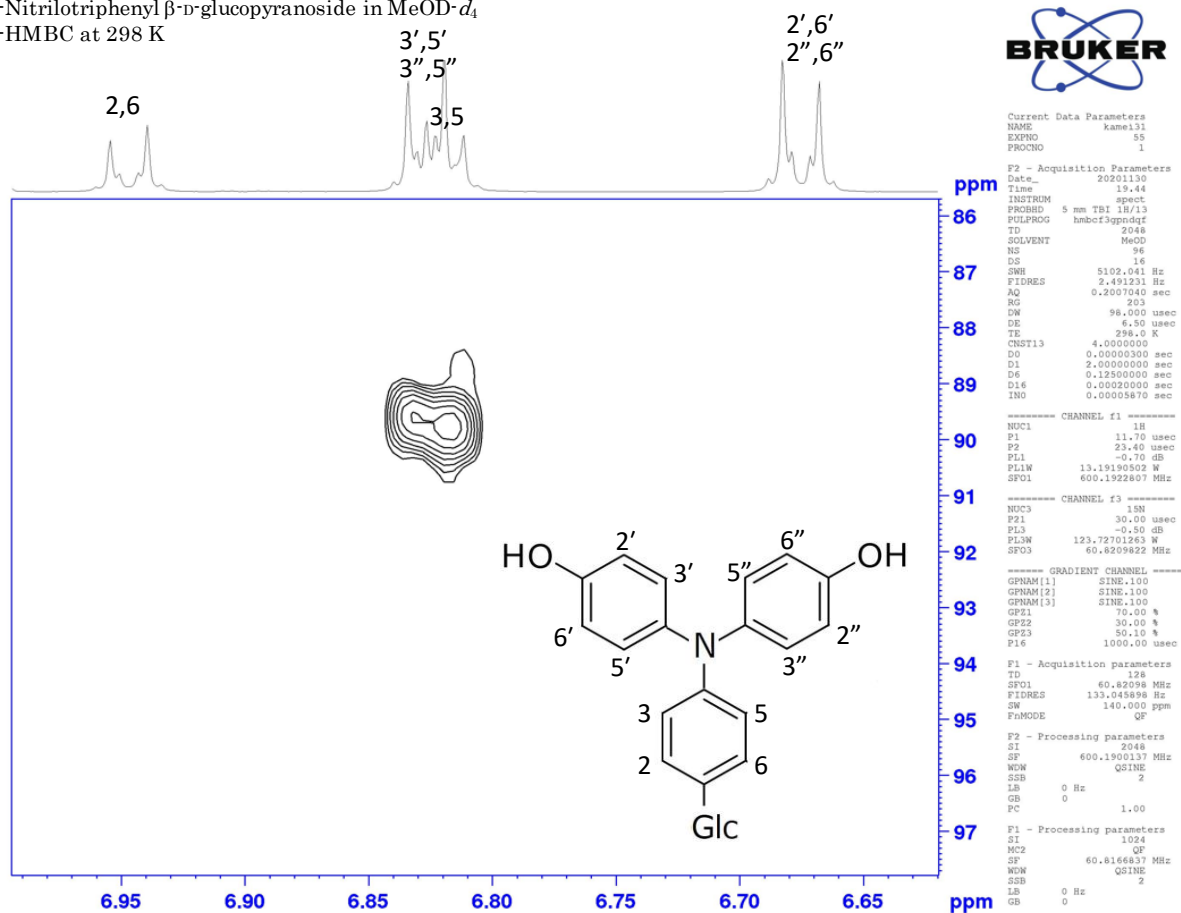

**Figure S19:**  $^1\text{H}$ - $^{15}\text{N}$  HMBC spectrum of compound **5** recorded in  $\text{CD}_3\text{OD}$

**Table S6:** NMR data of compound **6** identified from *P. clematidea* extract in CD<sub>3</sub>OD

| Position | <sup>13</sup> C-NMR<br>(150 MHz) | <sup>1</sup> H-NMR<br>(600 MHz) | HMBC<br>( <sup>1</sup> H → <sup>13</sup> C) |
|----------|----------------------------------|---------------------------------|---------------------------------------------|
| 2        | 163.8                            |                                 |                                             |
| 3        | 106.9                            | 6.62(1H, s)                     | C-2,4,10,1'                                 |
| 4        | 179.6                            |                                 |                                             |
| 5        | 153.4                            |                                 |                                             |
| 6        | 141.8                            |                                 |                                             |
| 7        | 160.0                            |                                 |                                             |
| 8        | 98.0                             | 7.09(1H, s)                     | C-4,6,7,9,10                                |
| 9        | 156.1                            |                                 |                                             |
| 10       | 113.1                            |                                 |                                             |
| 1'       | 124.5                            |                                 |                                             |
| 2'       | 129.1                            | 7.94 (2H, d, 8.9 Hz)            | C-2,4',6'                                   |
| 3'       | 115.6                            | 7.07 (2H, d, 8.9 Hz)            | C-1',4',5'                                  |
| 4'       | 164.2                            |                                 |                                             |
| 5'       | 115.6                            | 7.07 (2H, d, 8.9 Hz)            | C-1',3',4'                                  |
| 6'       | 129.1                            | 7.94 (2H, d, 8.9 Hz)            | C-2,2',4'                                   |
| 5-O-Me   | 62.7                             | 3.92                            | C-5                                         |
| 6-O-Me   | 61.8                             | 3.86                            | C-6                                         |
| 7-O-Me   | 57.1                             | 4.00                            | C-7                                         |
| 4'-O-Me  | 56.1                             | 3.88                            | C-4'                                        |

Scutellarein tetramethyl ether (4',5,6,7-Tetramethoxyflavone) in MeOD-*d*<sub>4</sub>  
<sup>1</sup>H NMR at 298 K

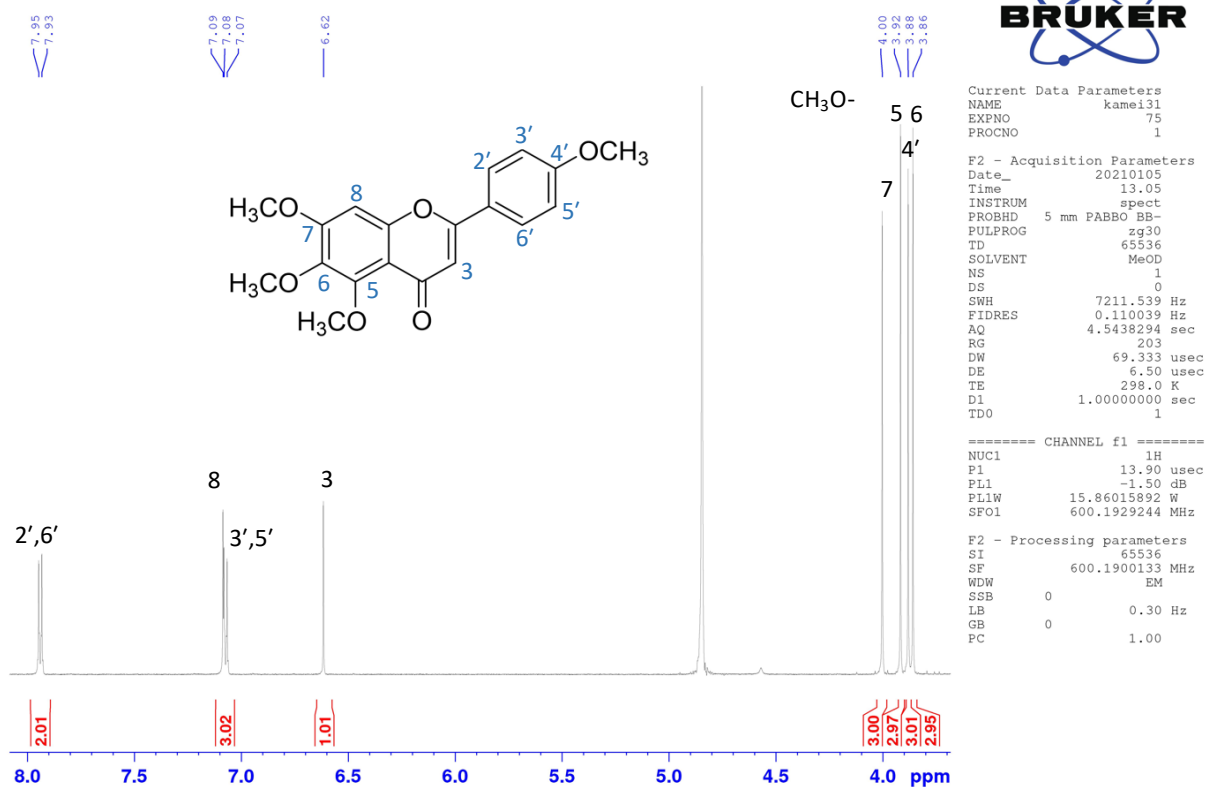**Figure S20:** Full assignment <sup>1</sup>H NMR spectrum of compound **6** recorded in CD<sub>3</sub>OD



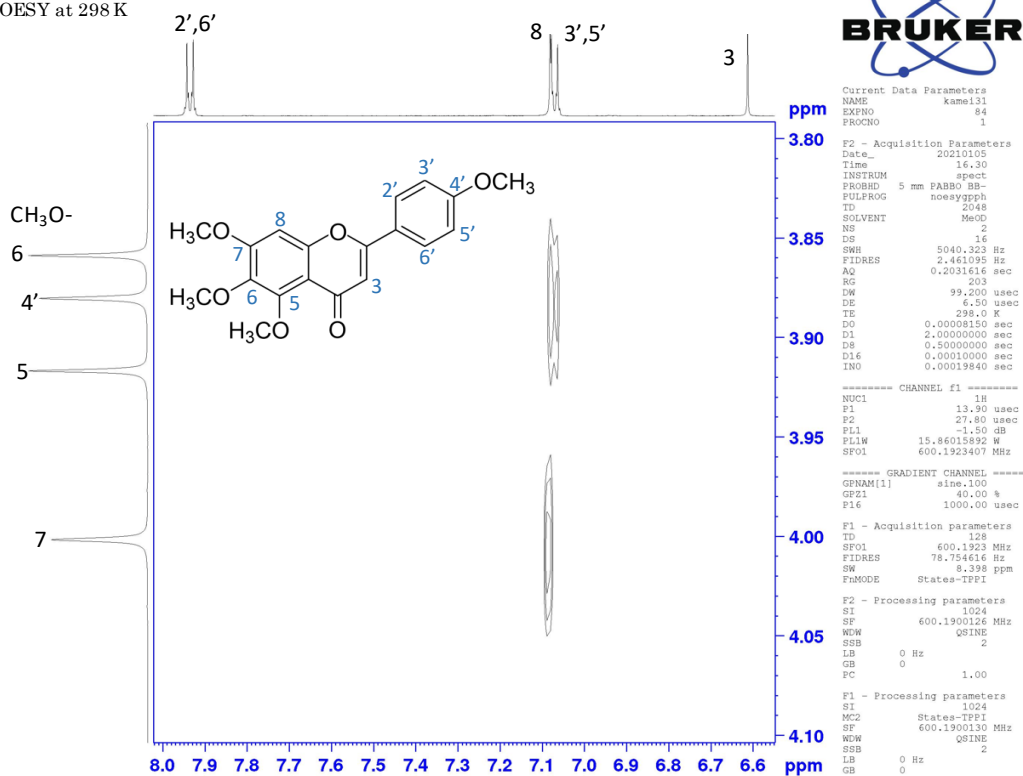

Scutellarein tetramethyl ether (4',5,6,7-Tetramethoxyflavone) in MeOD- $d_4$   
 $^1\text{H}$ - $^{13}\text{C}$ -HSQC at 298 K

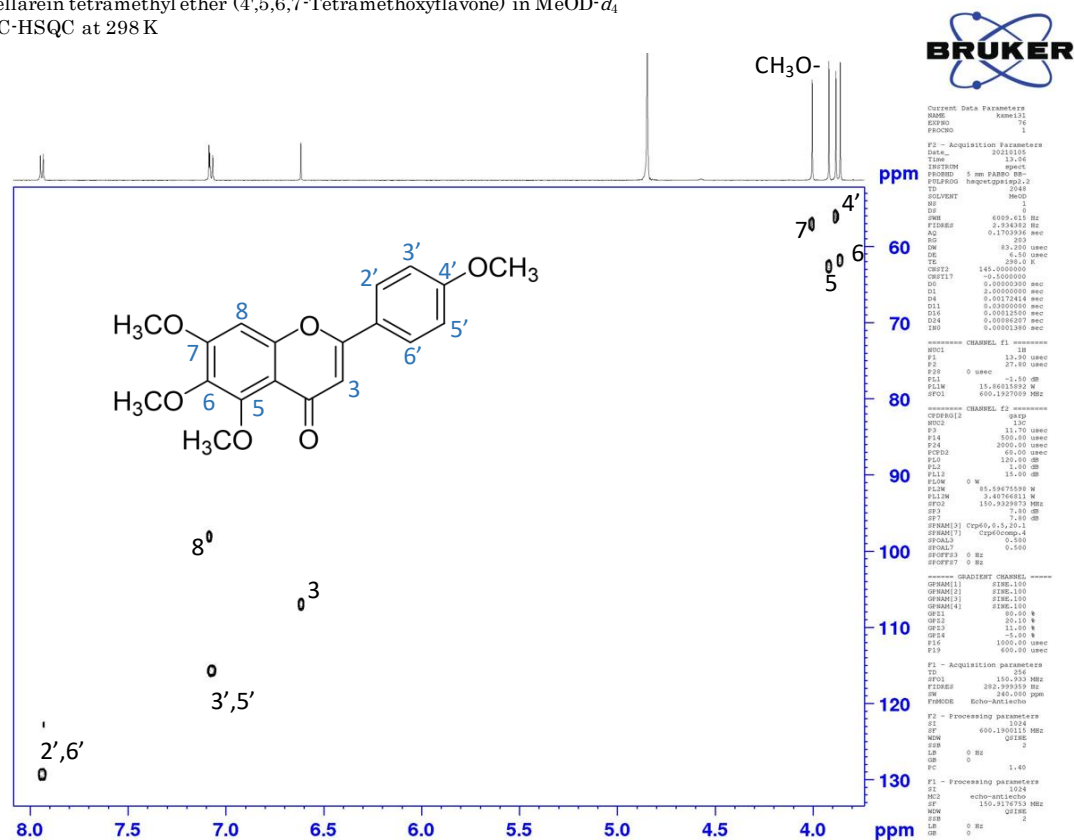

**Figure S22:**  $^1\text{H}$ - $^{13}\text{C}$  HSQC spectrum of compound **6** recorded in  $\text{CD}_3\text{OD}$

Scutellarein tetramethyl ether (4',5,6,7-Tetramethoxyflavone) in MeOD-*d*<sub>4</sub>  
<sup>1</sup>H-<sup>13</sup>C-HMBC at 298 K

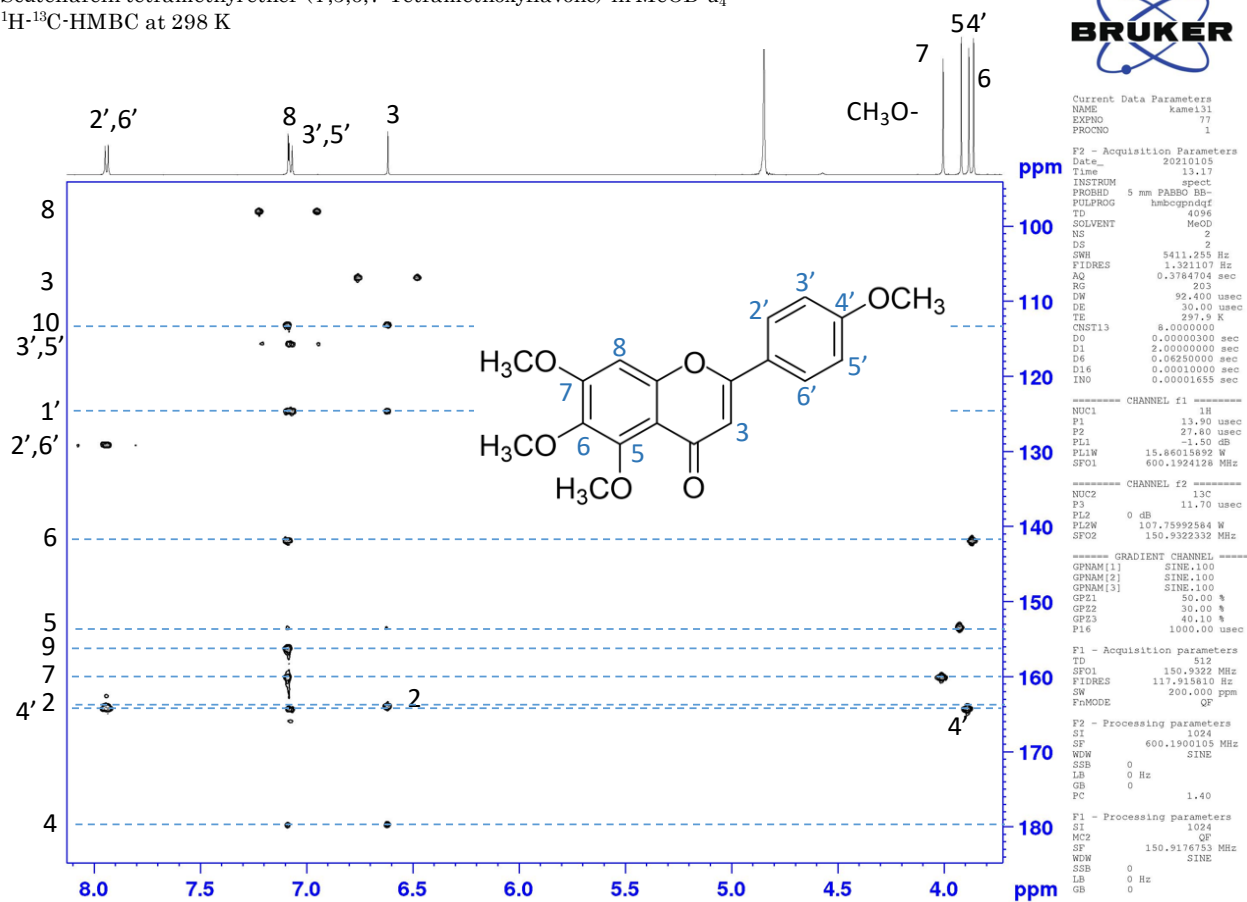

**Figure S23:** <sup>1</sup>H-<sup>13</sup>C HMBC spectrum of compound **6** recorded in CD<sub>3</sub>OD

**Table S7:** NMR data of compound **7** identified from *P. clematidea* extract in CD<sub>3</sub>OD

| Position | <sup>13</sup> C-NMR<br>(150 MHz) | <sup>1</sup> H-NMR<br>(600 MHz) | HMBC<br>( <sup>1</sup> H → <sup>13</sup> C) |
|----------|----------------------------------|---------------------------------|---------------------------------------------|
| 2        | 163.4                            |                                 |                                             |
| 3        | 107.3                            | 6.53 (1H, s)                    | C-2,4,10,1'                                 |
| 4        | 180.1                            |                                 |                                             |
| 5        | 162.1                            |                                 |                                             |
| 6        | 97.4                             | 6.44 (1H, d, 2.2 Hz)            | C-5,7,8,10                                  |
| 7        | 166.5                            |                                 |                                             |
| 8        | 94.3                             | 6.67 (1H, d, 2.2 Hz)            | C-6,7, 9,10                                 |
| 9        | 161.3                            |                                 |                                             |
| 10       | 109.4                            |                                 |                                             |
| 1'       | 124.5                            |                                 |                                             |
| 2'       | 129.0                            | 7.85 (1H, d, 8.9 Hz)            | C-2,4',6'                                   |
| 3'       | 115.6                            | 7.02 (1H, d, 8.9 Hz)            | C-1',4',5'                                  |
| 4'       | 164.2                            |                                 |                                             |
| 5'       | 115.6                            | 7.02 (1H, d, 8.9 Hz)            | C-1',3',4'                                  |
| 6'       | 129.0                            | 7.85 (1H, d, 8.9 Hz)            | C-2,2',4'                                   |
| 5-O-Me   | 56.60                            | 3.87                            | C-5                                         |
| 7-O-Me   | 56.60                            | 3.91                            | C-7                                         |
| 4'-O-Me  | 56.10                            | 3.86                            | C-4'                                        |

Apigenin trimethyl ether (4',5,7-Trimethoxyflavone) in MeOD-*d*<sub>4</sub>  
<sup>1</sup>H NMR at 298 K

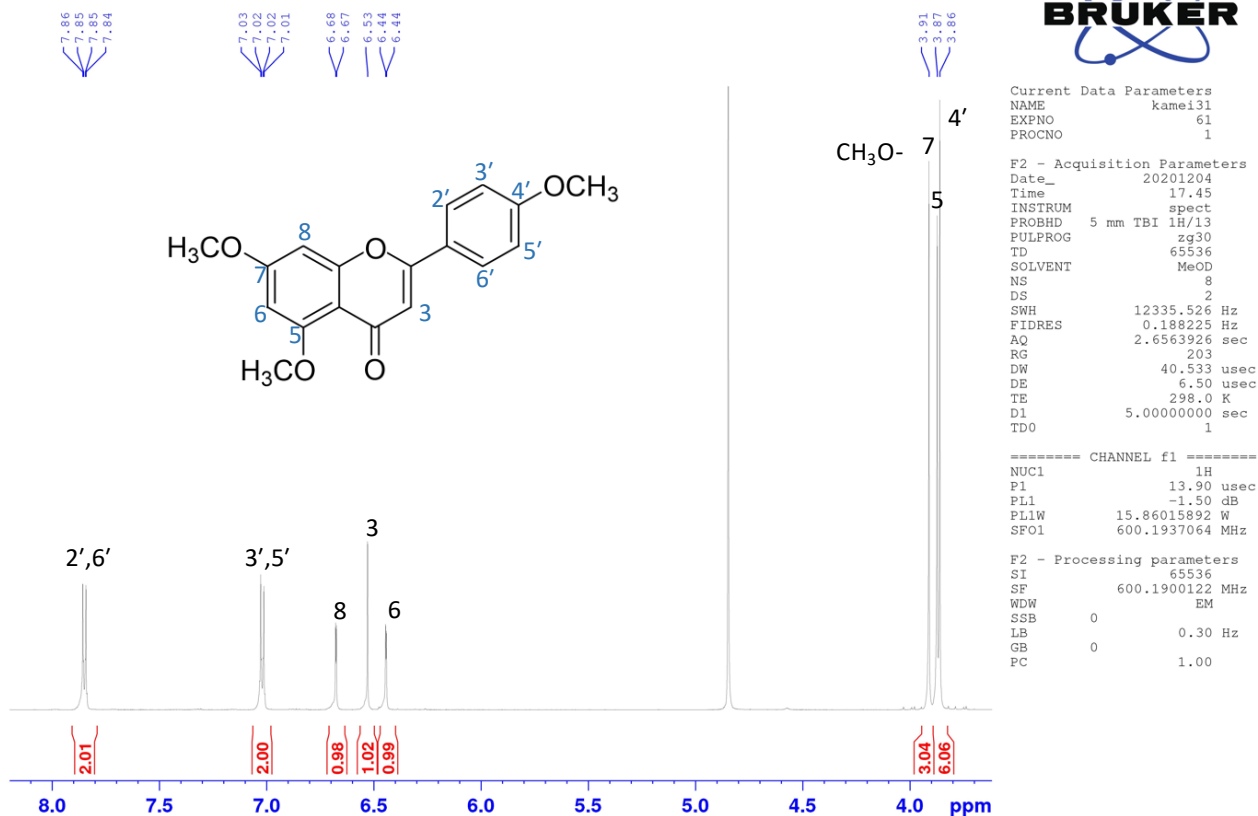**Figure S24:** Full assignment <sup>1</sup>H NMR spectrum of compound **7** recorded in CD<sub>3</sub>OD

Apigenin trimethyl ether (4',5,7-Trimethoxyflavone) in MeOD-*d*<sub>4</sub>  
NOESY at 298 K

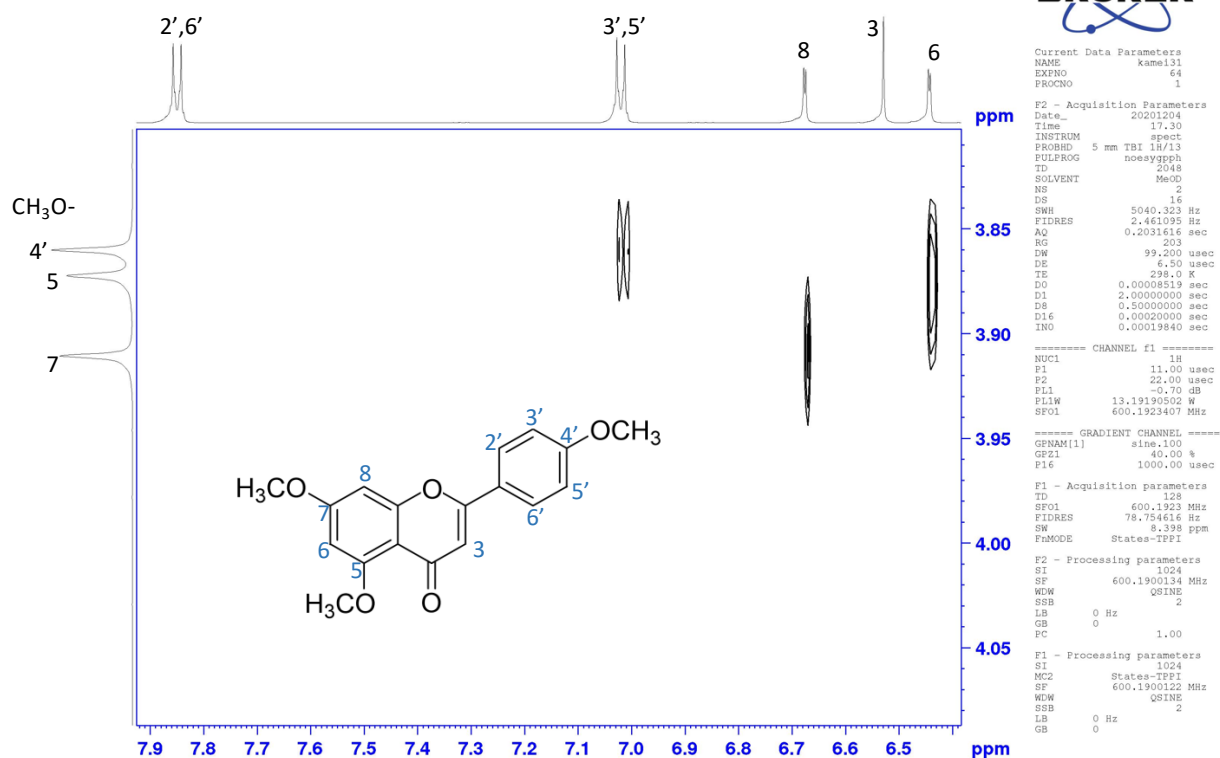

**Figure S25:** NOESY spectrum of compound **7** recorded in CD<sub>3</sub>OD

Apigenin trimethyl ether (4',5,7-Trimethoxyflavone) in MeOD-*d*<sub>4</sub>  
<sup>13</sup>C NMR at 298 K

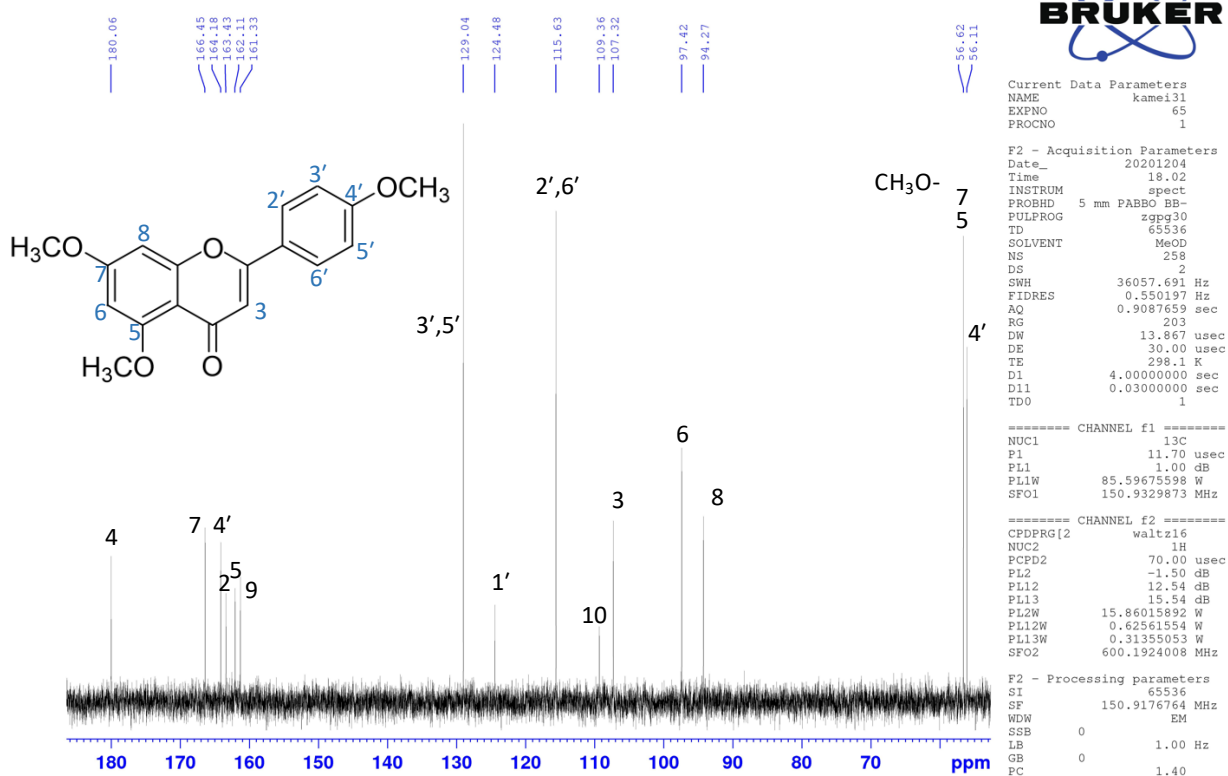

**Figure S26:** <sup>13</sup>C NMR spectrum of compound **7** recorded in CD<sub>3</sub>OD

Apigenin trimethyl ether (4',5,7-Trimethoxyflavone) in MeOD- $d_4$   
 $^1\text{H}$ - $^{13}\text{C}$ -HSQC at 298 K

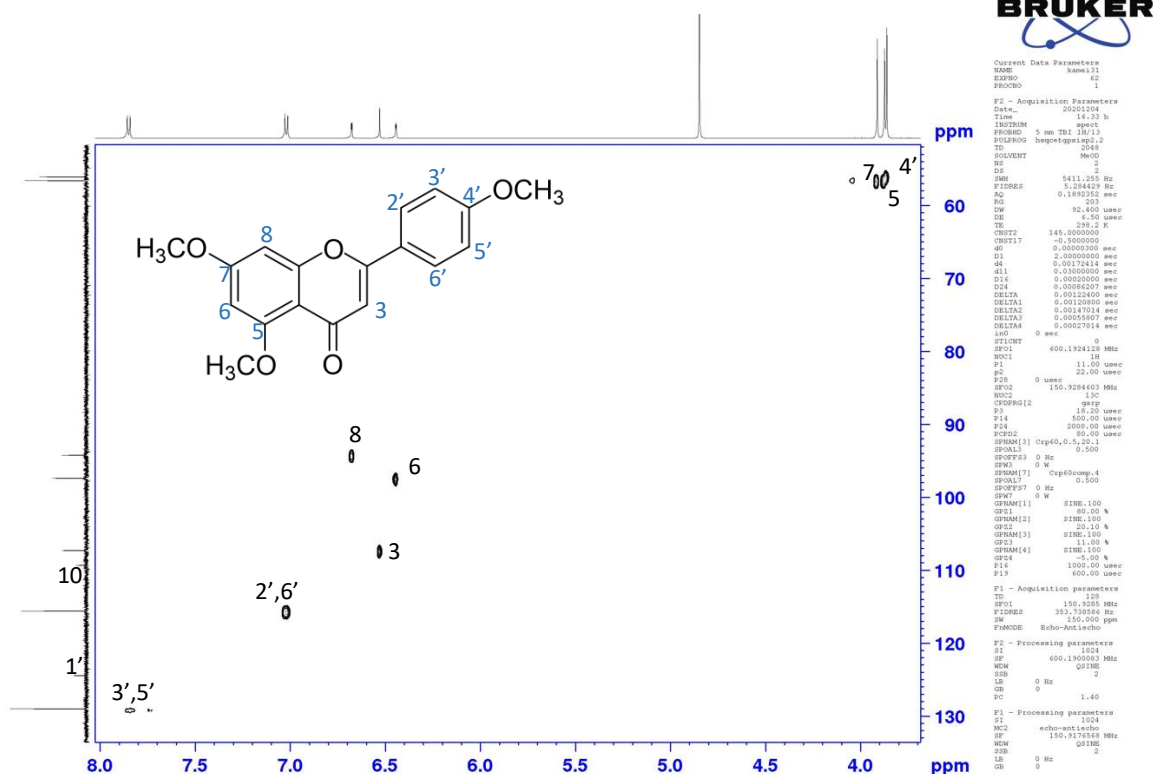

Apigenin trimethyl ether (4',5,7-Trimethoxyflavone) in MeOD- $d_4$   
 $^1\text{H}$ - $^{13}\text{C}$ -HMBC at 298 K

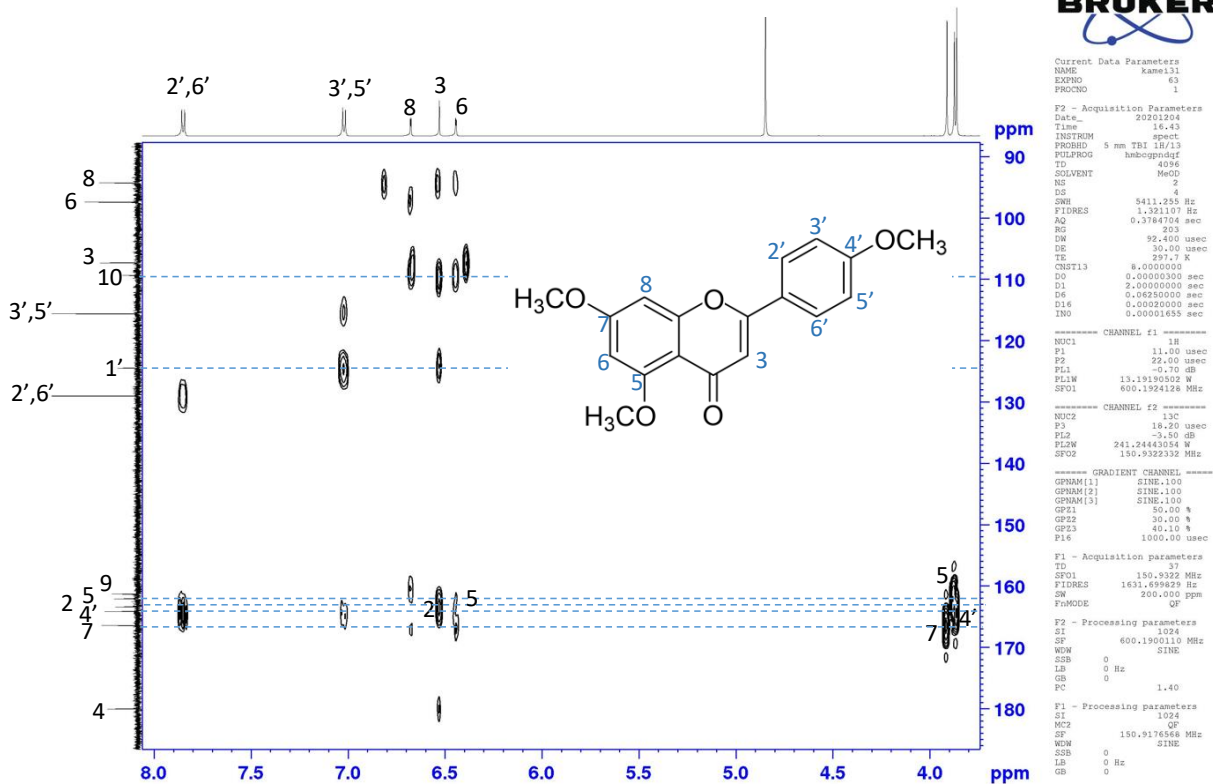

**Table :** NMR data of compound **S8** identified from *P. clematidea* extract in CD<sub>3</sub>OD

| Position | <sup>13</sup> C-NMR<br>(150 MHz) | <sup>1</sup> H-NMR<br>(600 MHz) | HMBC<br>( <sup>1</sup> H → <sup>13</sup> C) |
|----------|----------------------------------|---------------------------------|---------------------------------------------|
| 2        | 163.8                            |                                 |                                             |
| 3        | 107.1                            | 6.66 (1H, s)                    | C-2,4,10,1'                                 |
| 4        | 179.6                            |                                 |                                             |
| 5        | 153.3                            |                                 |                                             |
| 6        | 141.8                            |                                 |                                             |
| 7        | 160.0                            |                                 |                                             |
| 8        | 98.2                             | 7.14(1H, s)                     | C-4,6,7,9,10                                |
| 9        | 156.2                            |                                 |                                             |
| 10       | 113.1                            |                                 |                                             |
| 1'       | 125.0                            |                                 |                                             |
| 2'       | 110.7                            | 7.51 (1H, d, 2.1 Hz)            | C-2,3',4',6'                                |
| 3'       | 151.0                            |                                 |                                             |
| 4'       | 153.8                            |                                 |                                             |
| 5'       | 112.8                            | 7.11 (1H, d, 8.5 Hz)            | C-1',3'                                     |
| 6'       | 121.4                            | 7.63 (1H, dd, 8.5, 2.1 Hz)      | C-2,2',4'                                   |
| 5-O-Me   | 62.6                             | 3.92                            | C-5                                         |
| 6-O-Me   | 61.9                             | 3.86                            | C-6                                         |
| 7-O-Me   | 57.2                             | 4.01                            | C-7                                         |
| 3'-O-Me  | 56.7                             | 3.95                            | C-3'                                        |
| 4'-O-Me  | 56.7                             | 3.92                            | C-4'                                        |

Sinensetin (3',4',5,6,7-Pentamethoxy flavone) in MeOD- $d_4$   
 $^1\text{H}$  NMR at 298 K

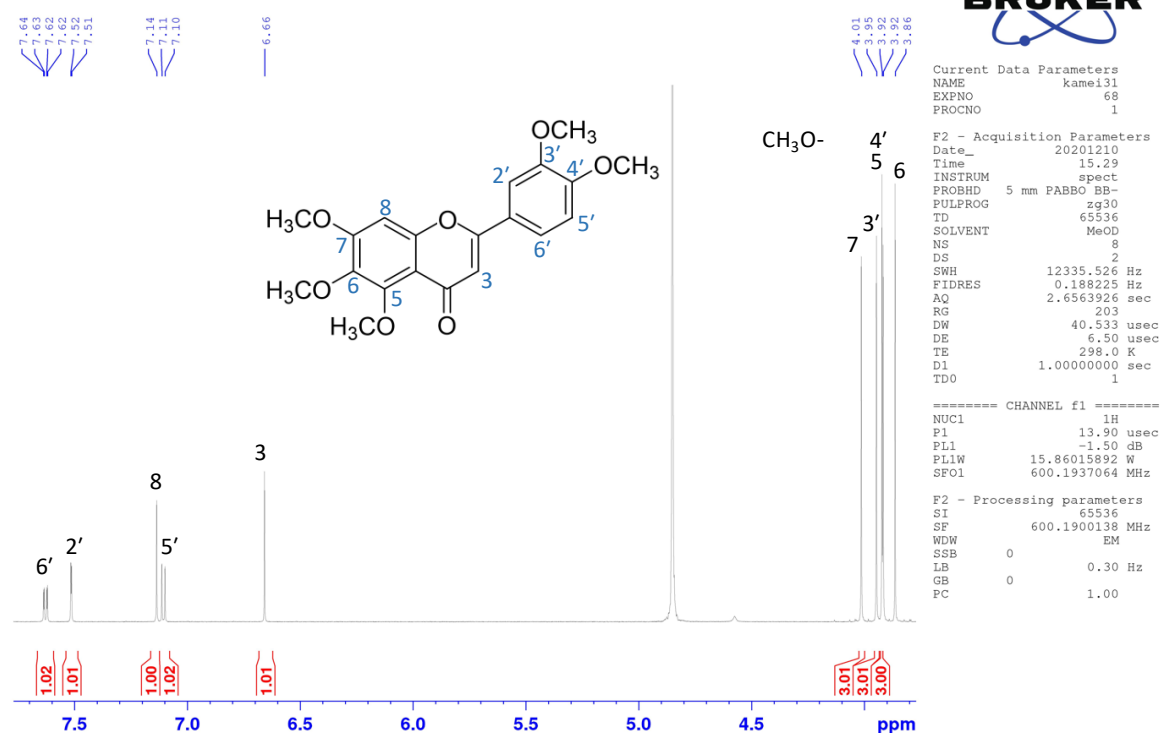

**Figure S29:** Full assignment  $^1\text{H}$  NMR spectrum of compound **8** recorded in  $\text{CD}_3\text{OD}$

Sinensetin (3',4',5,6,7-Pentamethoxy flavone) in MeOD- $d_4$   
 $^1\text{H}$ - $^{13}\text{C}$ -HSQC at 298 K

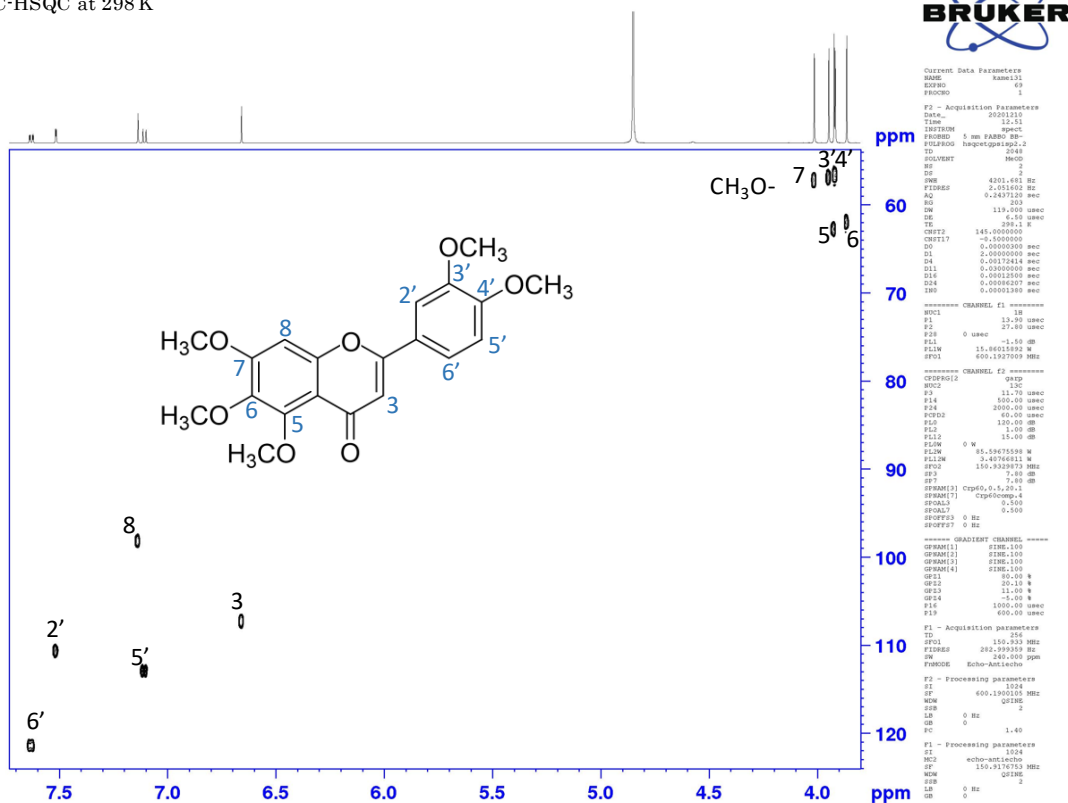

Sinensetin (3',4',5,6,7-Pentamethoxy flavone) in MeOD- $d_4$   
 $^1\text{H}$ - $^{13}\text{C}$ -HMBC at 298 K

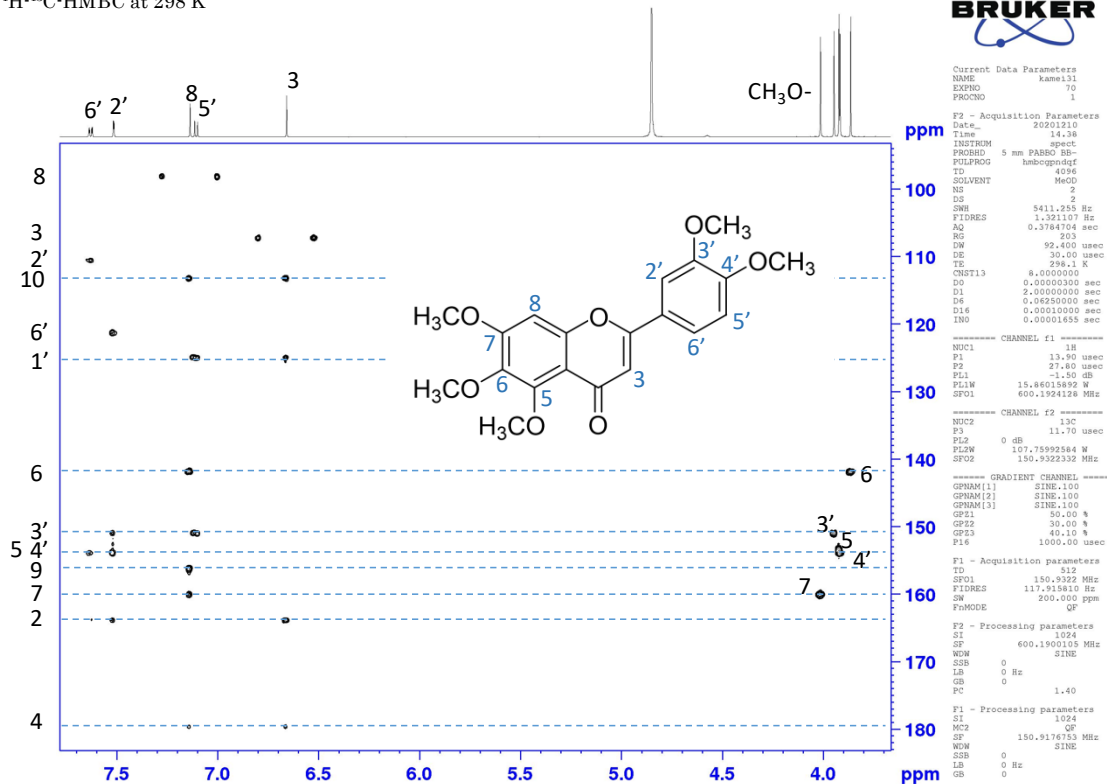

**Figure S31:**  $^1\text{H}$ - $^{13}\text{C}$  HMBC spectrum of compound **8** recorded in  $\text{CD}_3\text{OD}$

**Table :** NMR data of compound **S9** identified from *P. clematidea* extract in  $\text{CD}_3\text{OD}$

| Position | $^{13}\text{C}$ -NMR<br>(150 MHz) | $^1\text{H}$ -NMR<br>(600 MHz) | HMBC<br>( $^1\text{H} \rightarrow ^{13}\text{C}$ ) |
|----------|-----------------------------------|--------------------------------|----------------------------------------------------|
| 2        | 163.4                             |                                |                                                    |
| 3        | 107.6                             | 6.63 (1H, s)                   | C-2,4,10,1'                                        |
| 4        | 180.1                             |                                |                                                    |
| 5        | 162.1                             |                                |                                                    |
| 6        | 97.5                              | 6.52 (1H, d, 2.2 Hz)           | C-5,7, 8,10                                        |
| 7        | 166.5                             |                                |                                                    |
| 8        | 94.3                              | 6.80 (1H, d, 2.2 Hz)           | C-6,7,9,10                                         |
| 9        | 161.4                             |                                |                                                    |
| 10       | 109.3                             |                                |                                                    |
| 1'       | 124.9                             |                                |                                                    |
| 2'       | 110.4                             | 7.48 (1H, d, 2.1 Hz)           | C-2,3',4',6'                                       |
| 3'       | 150.9                             |                                |                                                    |
| 4'       | 153.8                             |                                |                                                    |
| 5'       | 112.9                             | 7.10 (1H, d, 8.5 Hz)           | C-1',3',4'                                         |
| 6'       | 121.2                             | 7.60 (1H, dd, 8.5, 2.1 Hz)     | C-2,2',4'                                          |
| 5-O-Me   | 56.7                              | 3.91                           | C-5                                                |
| 7-O-Me   | 56.7                              | 3.95                           | C-7                                                |
| 3'-O-Me  | 56.7                              | 3.94                           | C-3'                                               |
| 4'-O-Me  | 56.7                              | 3.91                           | C-4'                                               |

Luteolin Tetramethylether (3',4',5,7-Tetramethoxyflavone) in  $\text{MeOD}-d_4$   
 $^1\text{H}$  NMR at 298 K

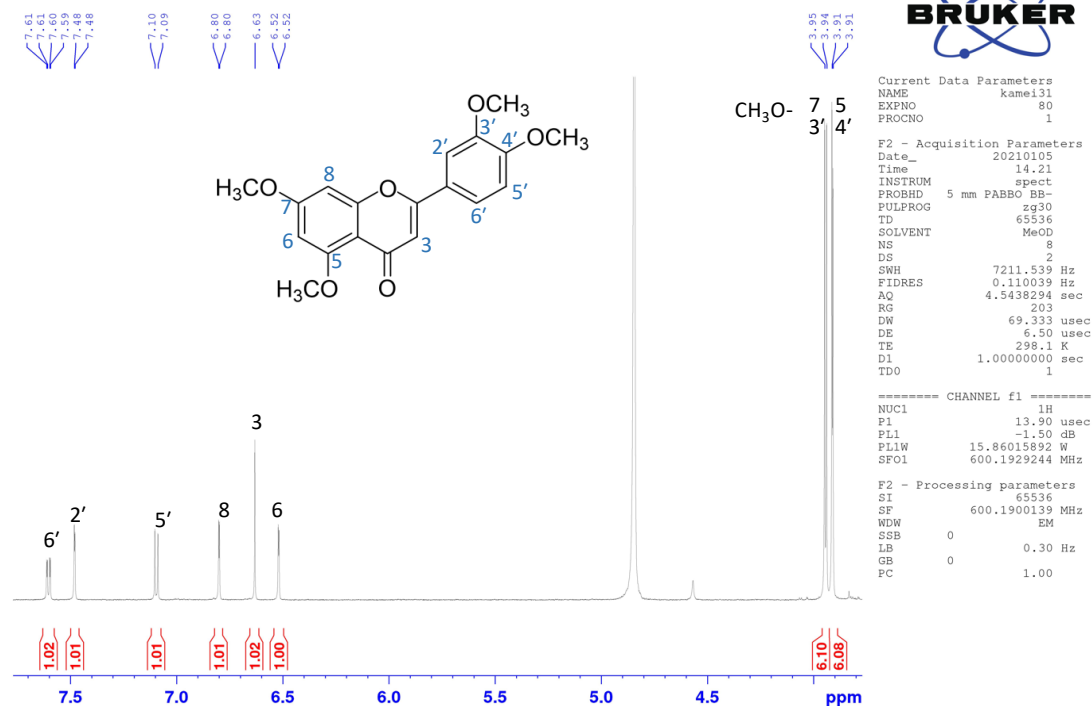

**Figure S32:** Full assignment  $^1\text{H}$  NMR spectrum of compound **9** recorded in  $\text{CD}_3\text{OD}$



Luteolin tetramethylether (3',4',5,7-Tetramethoxyflavone) in MeOD-*d*<sub>4</sub>  
NOESY at 298 K

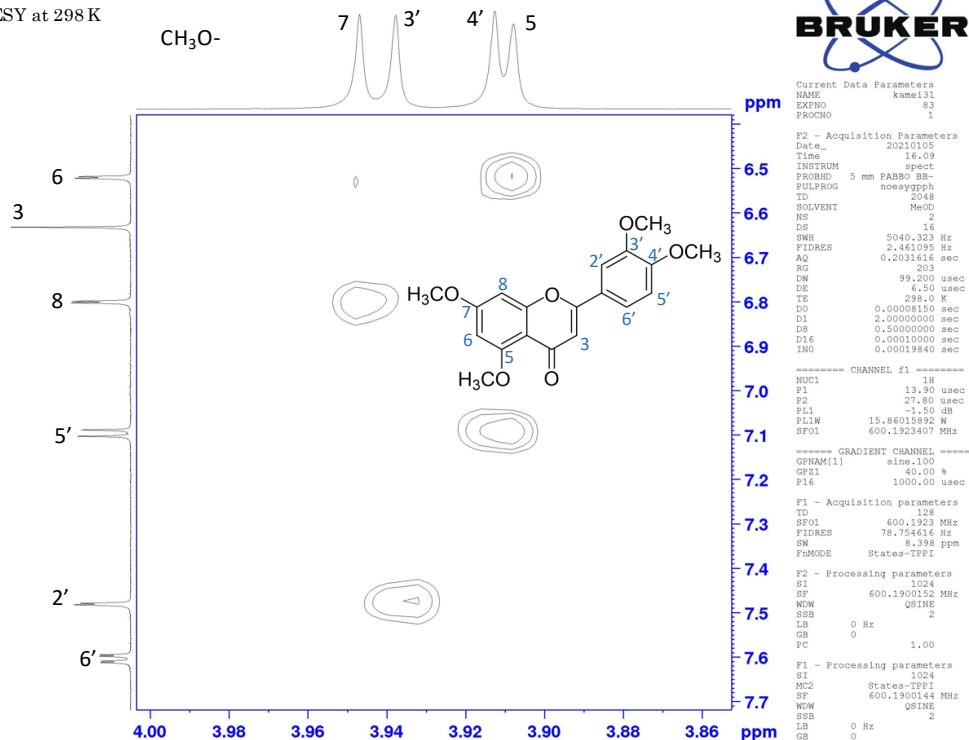

**Figure S33:** NOESY spectrum of compound **9** recorded in CD<sub>3</sub>OD

Luteolin tetramethylether (3',4',5,7-Tetramethoxyflavone) in MeOD-*d*<sub>4</sub>  
<sup>1</sup>H-<sup>13</sup>C-HSQC at 298 K

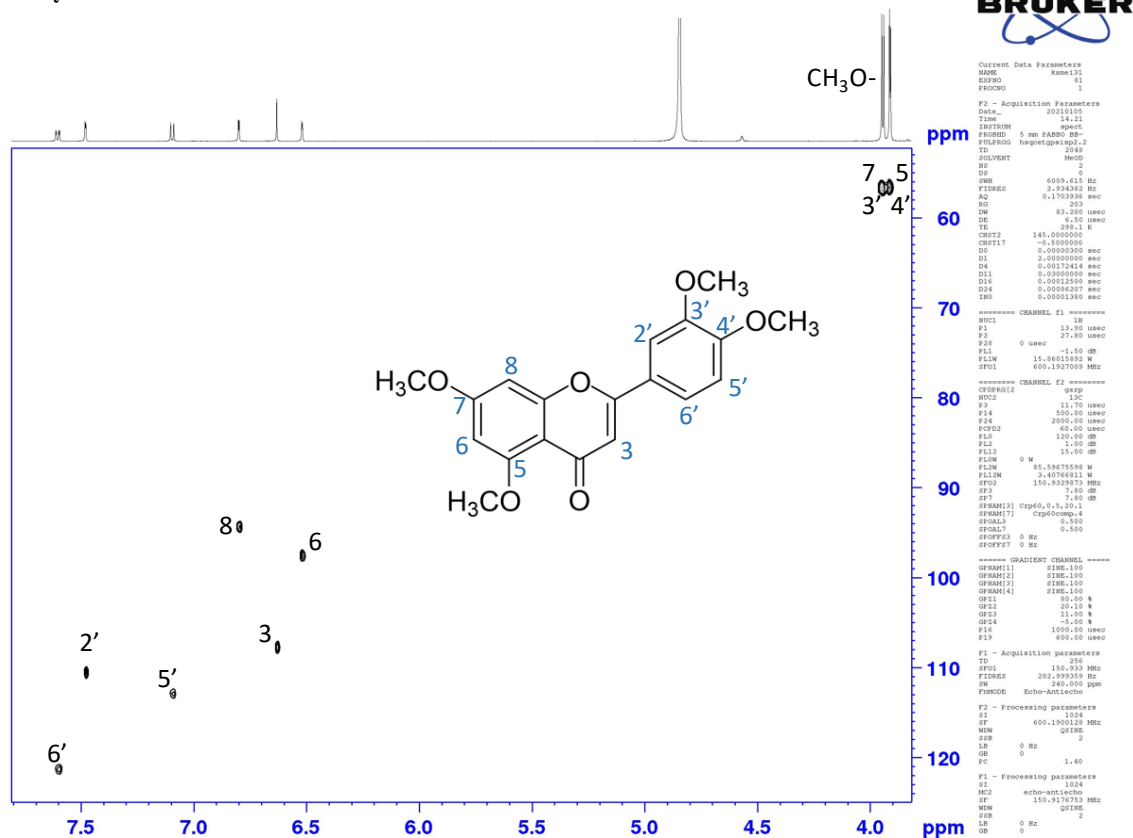

**Figure S34:** <sup>1</sup>H-<sup>13</sup>C HSQC spectrum of compound **9** recorded in CD<sub>3</sub>OD

Luteolin tetramethylether (3',4',5,7-Tetramethoxyflavone) in MeOD-*d*<sub>4</sub>  
<sup>1</sup>H-<sup>13</sup>C-HMBC at 298 K

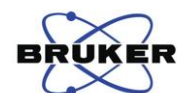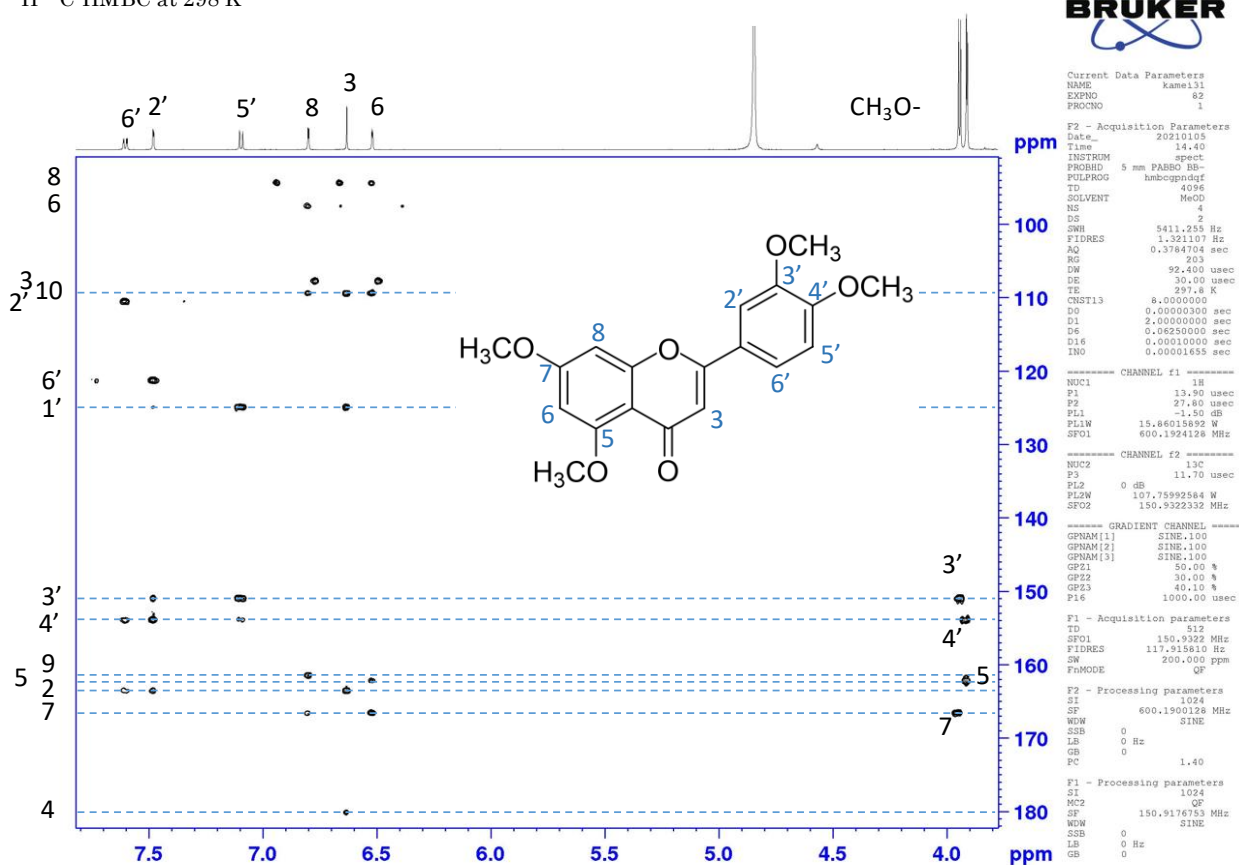

**Figure S35:** <sup>1</sup>H-<sup>13</sup>C HMBC spectrum of compound **9** recorded in CD<sub>3</sub>OD
